# Supplementary material
Source: Research Square preprint supplement (doi:10.21203/rs.3.rs-9440555/v1)
Supplement: Supplementary file 1 [file e43fd157614a75e0e1d82ce0.docx]

**Supplementary Table S1. List of *Stagonosporopsis* sequences retrieved from NCBI with corresponding species and country of origin.**

| **Sl.No** | **GenBank Accession Number** | **Species** | **Country of Origin** |
| --- | --- | --- | --- |
| 1 | MN534891 | *Stagonosporopsis vannaccii* | Brazil |
| 2 | MN422105 | *Stagonosporopsis rhizophila* | China |
| 3 | KY742191 | *Stagonosporopsis papillata* | China |
| 4 | MZ203135 | *Stagonosporopsis pogostemonis* | China |
| 5 | MT018029 | *Stagonosporopsis sambucella* | Austria |
| 6 | MT018021 | *Stagonosporopsis cucumeris* | Netherlands |
| 7 | MH311851 | *Stagonosporopsis malaiana* | China |
| 8 | MH311850 | *Stagonosporopsis bungeiana* | China |
| 9 | KY742193 | *Stagonosporopsis papillata* | China |
| 10 | KY742192 | *Stagonosporopsis papillata* | China |
| 11 | KY742189 | *Stagonosporopsis bomiensis* | China |
| 12 | PX245470 | *Stagonosporopsis sp.* | Russia |
| 13 | PX245469 | *Stagonosporopsis sp.* | Russia |
| 14 | PX245468 | *Stagonosporopsis sp.* | Russia |
| 15 | PX245467 | *Stagonosporopsis sp.* | Russia |
| 16 | OR578559 | *Stagonosporopsis sp.* | China |
| 17 | OQ343379 | *Stagonosporopsis pedicularis* | China |
| 18 | MZ203136 | *Stagonosporopsis pogostemonis* | China |
| 19 | MT018032 | *Stagonosporopsis nemophilae* | Denmark |
| 20 | MT018031 | *Stagonosporopsis nemophilae* | Netherlands |
| 21 | MT018013 | *Stagonosporopsis tanaceti* | Australia |
| 22 | MN422104 | *Stagonosporopsis rhizophila* | China |
| 23 | MN824479 | *Stagonosporopsis weymaniae* | Netherlands |
| 24 | MN824475 | *Stagonosporopsis stuijvenbergii* | Netherlands |
| 25 | MK434860 | *Stagonosporopsis pini* | China |
| 26 | KY100876 | *Stagonosporopsis ailanthicola* | Italy |
| 27 | MK205423 | *Stagonosporopsis flacciduvarum* | Italy |
| 28 | KT389686 | *Stagonosporopsis oculi-hominis* | USA |
| 29 | KT389683 | *Stagonosporopsis helianthi* | Italy |
| 30 | KT389677 | *Stagonosporopsis dennisii* | Netherlands |
| 31 | KT389675 | *Stagonosporopsis crystalliniformis* | Colombia |
| 32 | LC916163 | *Stagonosporopsis ajacis* | Japan |
| 33 | LC916162 | *Stagonosporopsis ajacis* | Japan |
| 34 | LC905563 | *Stagonosporopsis ajacis* | Japan |
| 35 | LC905562 | *Stagonosporopsis ajacis* | Japan |
| 36 | LC905401 | *Stagonosporopsis ajacis* | Japan |
| 37 | PX354083 | *Stagonosporopsis pogostemonis* | China |
| 38 | PX254435 | *Stagonosporopsis caricae* | South Korea |
| 39 | OR531376 | *Stagonosporopsis caricae* | China |
| 40 | OR531375 | *Stagonosporopsis caricae* | China |
| 41 | OR531374 | *Stagonosporopsis caricae* | China |
| 42 | OR531373 | *Stagonosporopsis caricae* | China |
| 43 | OR161338 | *Stagonosporopsis pogostemonis* | China |
| 44 | OP937342 | *Stagonosporopsis cucurbitacearum* | Canada |
| 45 | OP810571 | *Stagonosporopsis cucumeris* | South Korea |
| 46 | OP810570 | *Stagonosporopsis cucumeris* | South Korea |
| 47 | OM793716 | *Stagonosporopsis sp.* | China |
| 48 | OP103719 | *Stagonosporopsis ailanthicola* | Italy |
| 49 | MZ146784 | *Stagonosporopsis citrulli* | Iran |
| 50 | MZ161160 | *Stagonosporopsis caricae* | China |
| 51 | MW149264 | *Stagonosporopsis caricae* | South Korea |
| 52 | MT222287 | *Stagonosporopsis sp.* | Viet Nam |
| 53 | KY742190 | *Stagonosporopsis bomiensis* | China |
| 54 | PX245466 | *Stagonosporopsis sp.* | Russia |
| 55 | PX245465 | *Stagonosporopsis sp.* | Russia |
| 56 | PX245464 | *Stagonosporopsis sp.* | Russia |
| 57 | PX245463 | *Stagonosporopsis sp.* | Russia |
| 58 | PX138673 | *Stagonosporopsis pogostemonis* | China |
| 59 | PX138672 | *Stagonosporopsis pogostemonis* | China |
| 60 | PX138671 | *Stagonosporopsis pogostemonis* | China |
| 61 | PX138670 | *Stagonosporopsis pogostemonis* | China |
| 62 | PX138669 | *Stagonosporopsis pogostemonis* | China |
| 63 | PX138668 | *Stagonosporopsis pogostemonis* | China |
| 64 | PV691788 | *Stagonosporopsis sp.* | South Korea |
| 65 | PV021910 | *Stagonosporopsis pogostemonis* | China |
| 66 | PP785985 | *Stagonosporopsis pogostemonis* | China |
| 67 | PP389363 | *Stagonosporopsis pogostemonis* | China |
| 68 | PP389362 | *Stagonosporopsis pogostemonis* | China |
| 69 | PP389361 | *Stagonosporopsis pogostemonis* | China |
| 70 | PP389360 | *Stagonosporopsis pogostemonis* | China |
| 71 | PP259445 | *Stagonosporopsis ajacis* | China |
| 72 | OR672525 | *Stagonosporopsis sp.* | China |
| 73 | OR572168 | *Stagonosporopsis cucurbitacearum* | China |
| 74 | OR572167 | *Stagonosporopsis cucurbitacearum* | China |
| 75 | OR572166 | *Stagonosporopsis cucurbitacearum* | China |
| 76 | OR572165 | *Stagonosporopsis cucurbitacearum* | China |
| 77 | OR572164 | *Stagonosporopsis cucurbitacearum* | China |
| 78 | OR572163 | *Stagonosporopsis cucurbitacearum* | China |
| 79 | OR572162 | *Stagonosporopsis cucurbitacearum* | China |
| 80 | OR572161 | *Stagonosporopsis cucurbitacearum* | China |
| 81 | OR572160 | *Stagonosporopsis cucurbitacearum* | China |
| 82 | OR572159 | *Stagonosporopsis cucurbitacearum* | China |
| 83 | OR572158 | *Stagonosporopsis cucurbitacearum* | China |
| 84 | OR572157 | *Stagonosporopsis cucurbitacearum* | China |
| 85 | OR572156 | *Stagonosporopsis cucurbitacearum* | China |
| 86 | OR572155 | *Stagonosporopsis cucurbitacearum* | China |
| 87 | OR572154 | *Stagonosporopsis cucurbitacearum* | China |
| 88 | OR572153 | *Stagonosporopsis cucurbitacearum* | China |
| 89 | OR572152 | *Stagonosporopsis cucurbitacearum* | China |
| 90 | OR572151 | *Stagonosporopsis cucurbitacearum* | China |
| 91 | OR572150 | *Stagonosporopsis cucurbitacearum* | China |
| 92 | OR572149 | *Stagonosporopsis cucurbitacearum* | China |
| 93 | OR572148 | *Stagonosporopsis cucurbitacearum* | China |
| 94 | OR572147 | *Stagonosporopsis cucurbitacearum* | China |
| 95 | OR572146 | *Stagonosporopsis cucurbitacearum* | China |
| 96 | OR572145 | *Stagonosporopsis cucurbitacearum* | China |
| 97 | OR572144 | *Stagonosporopsis cucurbitacearum* | China |
| 98 | OR572143 | *Stagonosporopsis cucurbitacearum* | China |
| 99 | OR572142 | *Stagonosporopsis cucurbitacearum* | China |
| 100 | OR572141 | *Stagonosporopsis cucurbitacearum* | China |
| 101 | OR572140 | *Stagonosporopsis cucurbitacearum* | China |
| 102 | OR572139 | *Stagonosporopsis cucurbitacearum* | China |
| 103 | OR572138 | *Stagonosporopsis cucurbitacearum* | China |
| 104 | OR572137 | *Stagonosporopsis cucurbitacearum* | China |
| 105 | OR572136 | *Stagonosporopsis cucurbitacearum* | China |
| 106 | OR572135 | *Stagonosporopsis cucurbitacearum* | China |
| 107 | OR572134 | *Stagonosporopsis cucurbitacearum* | China |
| 108 | OR572133 | *Stagonosporopsis cucurbitacearum* | China |
| 109 | OR572132 | *Stagonosporopsis cucurbitacearum* | China |
| 110 | OR572131 | *Stagonosporopsis cucurbitacearum* | China |
| 111 | OR572130 | *Stagonosporopsis cucurbitacearum* | China |
| 112 | OR572129 | *Stagonosporopsis cucurbitacearum* | China |
| 113 | OR572128 | *Stagonosporopsis cucurbitacearum* | China |
| 114 | OR572127 | *Stagonosporopsis cucurbitacearum* | China |
| 115 | OR572126 | *Stagonosporopsis cucurbitacearum* | China |
| 116 | OR572125 | *Stagonosporopsis cucurbitacearum* | China |
| 117 | OR572124 | *Stagonosporopsis cucurbitacearum* | China |
| 118 | OR572123 | *Stagonosporopsis cucurbitacearum* | China |
| 119 | OR572122 | *Stagonosporopsis cucurbitacearum* | China |
| 120 | OR572121 | *Stagonosporopsis cucurbitacearum* | China |
| 121 | OR572120 | *Stagonosporopsis cucurbitacearum* | China |
| 122 | OR572119 | *Stagonosporopsis cucurbitacearum* | China |
| 123 | OR572118 | *Stagonosporopsis cucurbitacearum* | China |
| 124 | OR572117 | *Stagonosporopsis cucurbitacearum* | China |
| 125 | OR572116 | *Stagonosporopsis cucurbitacearum* | China |
| 126 | OR572115 | *Stagonosporopsis cucurbitacearum* | China |
| 127 | OR572114 | *Stagonosporopsis cucurbitacearum* | China |
| 128 | OR572113 | *Stagonosporopsis cucurbitacearum* | China |
| 129 | OR572112 | *Stagonosporopsis cucurbitacearum* | China |
| 130 | OR572111 | *Stagonosporopsis cucurbitacearum* | China |
| 131 | OR572110 | *Stagonosporopsis cucurbitacearum* | China |
| 132 | OR572109 | *Stagonosporopsis cucurbitacearum* | China |
| 133 | OR572108 | *Stagonosporopsis cucurbitacearum* | China |
| 134 | OR572107 | *Stagonosporopsis cucurbitacearum* | China |
| 135 | OR572106 | *Stagonosporopsis cucurbitacearum* | China |
| 136 | OR572105 | *Stagonosporopsis cucurbitacearum* | China |
| 137 | OR572104 | *Stagonosporopsis cucurbitacearum* | China |
| 138 | OR545224 | *Stagonosporopsis pogostemonis* | China |
| 139 | OR545223 | *Stagonosporopsis pogostemonis* | China |
| 140 | OQ326504 | *Stagonosporopsis pogostemonis* | Italy |
| 141 | OQ271774 | *Stagonosporopsis pogostemonis* | China |
| 142 | OQ343380 | *Stagonosporopsis sp.* | China |
| 143 | OQ190092 | *Stagonosporopsis pogostemonis* | China |
| 144 | OQ221891 | *Stagonosporopsis pogostemonis* | China |
| 145 | OM982463 | *Stagonosporopsis vannaccii* | China |
| 146 | OM982462 | *Stagonosporopsis vannaccii* | China |
| 147 | OM982461 | *Stagonosporopsis vannaccii* | China |
| 148 | OM982460 | *Stagonosporopsis vannaccii* | China |
| 149 | OM982459 | *Stagonosporopsis vannaccii* | China |
| 150 | OM982458 | *Stagonosporopsis vannaccii* | China |
| 151 | OM982457 | *Stagonosporopsis vannaccii* | China |
| 152 | MZ673654 | *Stagonosporopsis caricae* | China |
| 153 | MZ673653 | *Stagonosporopsis caricae* | China |
| 154 | MZ673652 | *Stagonosporopsis caricae* | China |
| 155 | MW531666 | *Stagonosporopsis cucurbitacearum* | China |
| 156 | MW531665 | *Stagonosporopsis cucurbitacearum* | China |
| 157 | MW531664 | *Stagonosporopsis cucurbitacearum* | China |
| 158 | MW531663 | *Stagonosporopsis cucurbitacearum* | China |
| 159 | MW531662 | *Stagonosporopsis cucurbitacearum* | China |
| 160 | MW531661 | *Stagonosporopsis cucurbitacearum* | China |
| 161 | MW321597 | *Stagonosporopsis cucurbitacearum* | China |
| 162 | MW853801 | *Stagonosporopsis vannaccii* | Italy |
| 163 | MW853800 | *Stagonosporopsis vannaccii* | Italy |
| 164 | MW853799 | *Stagonosporopsis vannaccii* | Italy |
| 165 | MW853798 | *Stagonosporopsis vannaccii* | Italy |
| 166 | MW853797 | *Stagonosporopsis vannaccii* | Italy |
| 167 | LR983949 | *Stagonosporopsis valerianellae* | Czech Republic |
| 168 | MN983695 | *Stagonosporopsis valerianellae* | Netherlands |
| 169 | MN983694 | *Stagonosporopsis valerianellae* | Netherlands |
| 170 | MN983693 | *Stagonosporopsis valerianellae* | France |
| 171 | MN983692 | *Stagonosporopsis trachelii* | Netherlands |
| 172 | MN983691 | *Stagonosporopsis trachelii* | Denmark |
| 173 | MN983690 | *Stagonosporopsis loticola* | New Zealand |
| 174 | MN983689 | *Stagonosporopsis hortensis* | Netherlands |
| 175 | MN983688 | *Stagonosporopsis hortensis* | Netherlands |
| 176 | MN983687 | *Stagonosporopsis hortensis* | Netherlands |
| 177 | MN983686 | *Stagonosporopsis dorenboschii* | Indonesia |
| 178 | MN983685 | *Stagonosporopsis dennisii* | Netherlands |
| 179 | MN983684 | *Stagonosporopsis dennisii* | Netherlands |
| 180 | MN983683 | *Stagonosporopsis cucurbitacearum* | Netherlands |
| 181 | MN983682 | *Stagonosporopsis cucurbitacearum* | Netherlands |
| 182 | MN983681 | *Stagonosporopsis caricae* | Brazil |
| 183 | MN983680 | *Stagonosporopsis caricae* | Brazil |
| 184 | MN983679 | *Stagonosporopsis caricae* | Brazil |
| 185 | MN983678 | *Stagonosporopsis andigena* | Peru |
| 186 | MT018040 | *Stagonosporopsis loticola* | New Zealand |
| 187 | MT018039 | *Stagonosporopsis dorenboschii* | Netherlands |
| 188 | MT018038 | *Stagonosporopsis ailanthicola* | New Zealand |
| 189 | MT018037 | *Stagonosporopsis ailanthicola* | Australia |
| 190 | MT018036 | *Stagonosporopsis ailanthicola* | USA |
| 191 | MT018035 | *Stagonosporopsis ajacis* | Netherlands |
| 192 | MT018034 | *Stagonosporopsis valerianellae* | Netherlands |
| 193 | MT018033 | *Stagonosporopsis valerianellae* | Netherlands |
| 194 | MT018030 | *Stagonosporopsis astragali* | Netherlands |
| 195 | MT018028 | *Stagonosporopsis lupini* | Peru |
| 196 | MT018027 | *Stagonosporopsis hortensis* | Colombia |
| 197 | MT018026 | *Stagonosporopsis andigena* | Peru |
| 198 | MT018025 | *Stagonosporopsis helianthi* | Italy |
| 199 | MT018024 | *Stagonosporopsis cucurbitacearum* | Netherlands |
| 200 | MT018023 | *Stagonosporopsis caricae* | Chile |
| 201 | MT018022 | *Stagonosporopsis caricae* | Indonesia |
| 202 | MT018020 | *Stagonosporopsis citrulli* | Germany |
| 203 | MT018019 | *Stagonosporopsis dennisii* | Canada |
| 204 | MT018018 | *Stagonosporopsis actaeae* | Netherlands |
| 205 | MT018017 | *Stagonosporopsis trachelii* | Germany |
| 206 | MT018016 | *Stagonosporopsis trachelii* | Sweden |
| 207 | MT018015 | *Stagonosporopsis rudbeckiae* | Netherlands |
| 208 | MT018014 | *Stagonosporopsis tanaceti* | Australia |
| 209 | MT018012 | *Stagonosporopsis chrysanthemi* | Germany |
| 210 | MT018011 | *Stagonosporopsis chrysanthemi* | Netherlands |
| 211 | MT018010 | *Stagonosporopsis chrysanthemi* | Colombia |
| 212 | MN824478 | *Stagonosporopsis stuijvenbergii* | Netherlands |
| 213 | MN824477 | *Stagonosporopsis stuijvenbergii* | Netherlands |
| 214 | MN824476 | *Stagonosporopsis stuijvenbergii* | Netherlands |
| 215 | MN227071 | *Stagonosporopsis sp.* | China |
| 216 | MN905511 | *Stagonosporopsis sp.* | China |
| 217 | MH853660 | *Stagonosporopsis citrulli* | China |
| 218 | KT389687 | *Stagonosporopsis trachelii* | Netherlands |
| 219 | KT389685 | *Stagonosporopsis lupini* | United Kingdom |
| 220 | KT389684 | *Stagonosporopsis loticola* | New Zealand |
| 221 | KT389682 | *Stagonosporopsis inoxydabilis* | Netherlands |
| 222 | KT389681 | *Stagonosporopsis hortensis* | Netherlands |
| 223 | KT389680 | *Stagonosporopsis hortensis* | Netherlands |
| 224 | KT389679 | *Stagonosporopsis heliopsidis* | Netherlands |
| 225 | KT389678 | *Stagonosporopsis dorenboschii* | Netherlands |
| 226 | KT389676 | *Stagonosporopsis cucurbitacearum* | New Zealand |
| 227 | KT389674 | *Stagonosporopsis artemisiicola* | France |
| 228 | KT389673 | *Stagonosporopsis ajacis* | Kenya |
| 229 | KT389672 | *Stagonosporopsis actaeae* | Netherlands |
| 230 | KY100877 | *Stagonosporopsis ailanthicola* | Italy |
| 231 | KC842131 | *Stagonosporopsis cucurbitacearum* | China |
| 232 | AF107801 | *Mycosphaerella citrullina* | USA |
| 233 | OR878479 | *Stagonosporopsis rhizophila* | South Korea |
| 234 | GU371767 | *Stagonosporopsis cucurbitacearum* | USA |

**Supplementary Table S2. Detection of recombination signals in *Stagonosporopsis* RPB2 sequences using different algorithms implemented in RDP4.**

| **Method** | **Sequences detected** | **Average P-value** |
| --- | --- | --- |
| RDP | - | - |
| GENECONV | 2 | 1.108 × 10⁻² |
| BootScan | 1 | 1.168 × 10⁻³ |
| MaxChi | - | - |
| Chimaera | - | - |
| SiScan | - | - |
| 3Seq | 1 | 3.516 × 10⁻⁴ |
| LARD | - | - |
| Phylpro | - | - |

**Supplementary Figure 1. RDP4 analysis showing the recombination event detected in sequence MW853797**

**
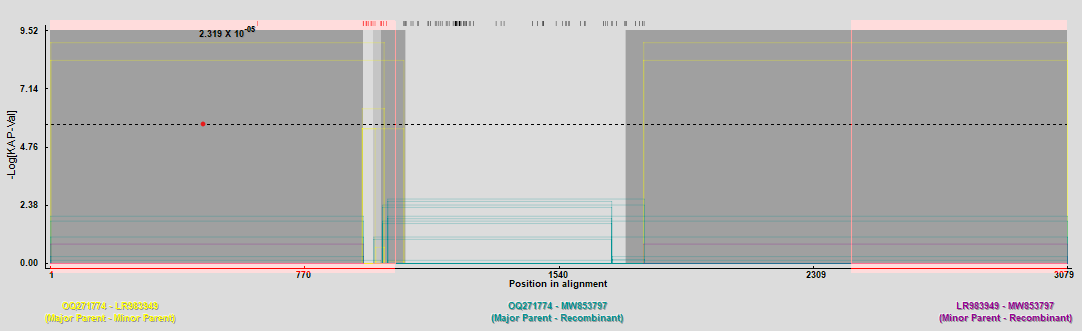
**

**Supplementary Table S3. Distribution of *Stagonosporopsis* isolates across haplotypes based on RPB2 sequences**

| Haplotype | Frequency | Isolates |
| --- | --- | --- |
| Hap_1 | 34 | MN534891, MZ203135, MZ203136, PX354083, OR161338, PX138673, PX138672, PX138671, PX138670, PX138669, PX138668, PP785985, PP389363, PP389362, PP389361, PP389360, OR545224, OR545223, OQ326504, OQ271774, OQ190092, OM982463, OM982462, OM982461, OM982460, OM982459, OM982458, OM982457, MW853801, MW853800, MW853799, MW853798, MW853797, MN905511 |
| Hap_2 | 5 | MN422105, MN422104, PV691788, MN227071, OR878479 |
| Hap_3 | 4 | KY742191, KY742192, KY742189, KY742190 |
| Hap_4 | 1 | MT018029 |
| Hap_5 | 3 | MT018021, OP810571, OP810570 |
| Hap_6 | 1 | MH311851 |
| Hap_7 | 15 | MH311850, PX254435, OR531376, OR531375, OR531374, OR531373, MZ161160, MW149264, MZ673654, MZ673652, MN983681, MN983680, MN983679, MT018023, MT018022 |
| Hap_8 | 1 | KY742193 |
| Hap_9 | 5 | PX245470, PX245469, PX245468, PX245467, OR578559 |
| Hap_10 | 1 | OQ343379 |
| Hap_11 | 2 | MT018032, MT018031 |
| Hap_12 | 7 | MT018013, OM793716, OR672525, MT018014, MT018012, MT018011, MT018010 |
| Hap_13 | 10 | MN824479, MN824475, MK205423, OP103719, MT018038, MT018037, MT018036, MN824478, MN824477, MN824476 |
| Hap_14 | 1 | MK434860 |
| Hap_15 | 2 | KY100876, KT389679 |
| Hap_16 | 1 | KT389686 |
| Hap_17 | 2 | KT389683, MT018025 |
| Hap_18 | 4 | KT389677, MN983685, MN983684, MT018019 |
| Hap_19 | 1 | KT389675 |
| Hap_20 | 7 | LC916163, LC916162, LC905563, LC905562, LC905401, MT018035, KT389673 |
| Hap_21 | 77 | OP937342, OR572168, OR572167, OR572165, OR572164, OR572163, OR572162, OR572161, OR572160, OR572159, OR572158, OR572157, OR572156, OR572155, OR572154, OR572153, OR572152, OR572151, OR572150, OR572149, OR572148, OR572147, OR572146, OR572145, OR572144, OR572143, OR572142, OR572141, OR572140, OR572139, OR572138, OR572137, OR572136, OR572135, OR572134, OR572133, OR572132, OR572131, OR572130, OR572129, OR572128, OR572127, OR572126, OR572125, OR572124, OR572123, OR572122, OR572121, OR572120, OR572119, OR572118, OR572117, OR572116, OR572115, OR572114, OR572113, OR572112, OR572111, OR572110, OR572109, OR572108, OR572107, OR572106, OR572105, OR572104, MW531666, MW531665, MW531664, MW531663, MW531662, MW531661, MW321597, MN983683, MN983682, MT018024, KT389676, GU371767 |
| Hap_22 | 5 | MZ146784, OR572166, MT018020, KC842131, AF107801 |
| Hap_23 | 1 | MT222287 |
| Hap_24 | 3 | PX245466, PX245465, PX245464 |
| Hap_25 | 1 | PX245463 |
| Hap_26 | 1 | PV021910 |
| Hap_27 | 1 | PP259445 |
| Hap_28 | 2 | OQ343380, MT018030 |
| Hap_29 | 1 | OQ221891 |
| Hap_30 | 1 | MZ673653 |
| Hap_31 | 1 | LR983949 |
| Hap_32 | 5 | MN983695, MN983694, MN983693, MT018034, MT018033 |
| Hap_33 | 5 | MN983692, MN983691, MT018017, MT018016, KT389687 |
| Hap_34 | 3 | MN983690, MT018040, KT389684 |
| Hap_35 | 8 | MN983689, MN983688, MN983687, MT018027, MH853660, KT389681, KT389680, KY100877 |
| Hap_36 | 3 | MN983686, MT018039, KT389678 |
| Hap_37 | 2 | MN983678, MT018026 |
| Hap_38 | 2 | MT018028, KT389685 |
| Hap_39 | 1 | MT018018 |
| Hap_40 | 1 | MT018015 |
| Hap_41 | 1 | KT389682 |
| Hap_42 | 1 | KT389674 |
| Hap_43 | 1 | KT389672 |

**Supplementary Table S4. Nucleotide composition and GC content at overall and codon positions (1st, 2nd, and 3rd) of the analyzed sequences**

| **Sequence** | **A** | **T** | **G** | **C** | **GC** | **A1** | **T1** | **G1** | **C1** | **GC1** | **A2** | **T2** | **G2** | **C2** | **GC2** | **A3** | **T3** | **G3** | **C3** | **GC3** | **GC12** |
| --- | --- | --- | --- | --- | --- | --- | --- | --- | --- | --- | --- | --- | --- | --- | --- | --- | --- | --- | --- | --- | --- |
| MN534891 | 27.56 | 22.69 | 27.56 | 22.18 | 49.75 | 37.88 | 28.79 | 17.17 | 16.16 | 33.33 | 17.17 | 28.28 | 25.76 | 28.79 | 54.55 | 27.27 | 11.11 | 39.9 | 21.72 | 61.62 | 43.94 |
| MN422105 | 25.84 | 22.32 | 28.02 | 23.83 | 51.85 | 36.87 | 29.29 | 16.67 | 17.17 | 33.84 | 13.64 | 26.26 | 27.78 | 32.32 | 60.1 | 26.26 | 11.62 | 39.9 | 22.22 | 62.12 | 46.97 |
| KY742191 | 25.67 | 22.82 | 28.69 | 22.82 | 51.51 | 37.37 | 29.29 | 16.67 | 16.67 | 33.33 | 12.12 | 28.79 | 29.8 | 29.29 | 59.09 | 27.27 | 10.61 | 39.39 | 22.73 | 62.12 | 46.21 |
| MZ203135 | 26.8 | 22.46 | 25.88 | 24.86 | 50.74 | 35.83 | 26.94 | 17.78 | 19.44 | 37.22 | 15.56 | 26.39 | 26.39 | 31.67 | 58.06 | 28.89 | 13.89 | 33.61 | 23.61 | 57.22 | 47.64 |
| MT018029 | 25.34 | 22.82 | 28.36 | 23.49 | 51.85 | 36.87 | 29.29 | 16.67 | 17.17 | 33.84 | 12.63 | 27.78 | 28.28 | 31.31 | 59.6 | 25.76 | 11.62 | 40.4 | 22.22 | 62.63 | 46.72 |
| MT018021 | 26.68 | 22.99 | 27.68 | 22.65 | 50.34 | 37.37 | 28.79 | 16.67 | 17.17 | 33.84 | 16.16 | 28.28 | 26.77 | 28.79 | 55.56 | 25.76 | 12.12 | 39.9 | 22.22 | 62.12 | 44.7 |
| MH311851 | 26.05 | 22.52 | 28.4 | 23.03 | 51.43 | 13.13 | 27.78 | 29.29 | 29.8 | 59.09 | 27.27 | 10.61 | 39.39 | 22.73 | 62.12 | 37.88 | 29.29 | 16.16 | 16.67 | 32.83 | 60.61 |
| MH311850 | 26.72 | 23.03 | 27.39 | 22.86 | 50.25 | 16.16 | 28.79 | 26.26 | 28.79 | 55.05 | 25.76 | 11.62 | 39.9 | 22.73 | 62.63 | 37.88 | 28.79 | 16.16 | 17.17 | 33.33 | 58.84 |
| KY742193 | 25.67 | 22.99 | 28.52 | 22.82 | 51.34 | 37.37 | 29.29 | 16.67 | 16.67 | 33.33 | 12.12 | 29.29 | 29.29 | 29.29 | 58.59 | 27.27 | 10.61 | 39.39 | 22.73 | 62.12 | 45.96 |
| KY742192 | 25.67 | 22.82 | 28.69 | 22.82 | 51.51 | 37.37 | 29.29 | 16.67 | 16.67 | 33.33 | 12.12 | 28.79 | 29.8 | 29.29 | 59.09 | 27.27 | 10.61 | 39.39 | 22.73 | 62.12 | 46.21 |
| KY742189 | 26.01 | 22.65 | 28.52 | 22.82 | 51.34 | 37.37 | 29.29 | 16.67 | 16.67 | 33.33 | 13.13 | 28.28 | 29.29 | 29.29 | 58.59 | 27.27 | 10.61 | 39.39 | 22.73 | 62.12 | 45.96 |
| PX245470 | 26.24 | 22.61 | 26.84 | 24.3 | 51.15 | 14.18 | 26.91 | 28.36 | 30.55 | 58.91 | 28 | 14.55 | 34.55 | 22.91 | 57.45 | 36.73 | 26.55 | 17.45 | 19.27 | 36.73 | 58.18 |
| PX245469 | 25.06 | 22.62 | 26.33 | 25.99 | 52.32 | 35.19 | 26.48 | 18.12 | 20.21 | 38.33 | 13.24 | 29.97 | 26.13 | 30.66 | 56.79 | 26.48 | 11.5 | 34.84 | 27.18 | 62.02 | 47.56 |
| PX245468 | 25.46 | 22.2 | 26.17 | 26.17 | 52.34 | 36.09 | 24.77 | 17.74 | 21.41 | 39.14 | 13.76 | 29.66 | 25.99 | 30.58 | 56.57 | 26.61 | 12.23 | 34.56 | 26.61 | 61.16 | 47.86 |
| PX245467 | 25.46 | 22 | 26.78 | 25.76 | 52.55 | 13.46 | 27.83 | 27.22 | 31.5 | 58.72 | 27.52 | 12.23 | 35.17 | 25.08 | 60.24 | 35.47 | 25.69 | 18.04 | 20.8 | 38.84 | 59.48 |
| OR578559 | 25.67 | 22.15 | 28.02 | 24.16 | 52.18 | 36.87 | 29.29 | 16.67 | 17.17 | 33.84 | 13.64 | 26.77 | 27.27 | 32.32 | 59.6 | 25.76 | 10.61 | 40.4 | 23.23 | 63.64 | 46.72 |
| OQ343379 | 26.01 | 22.15 | 27.52 | 24.33 | 51.85 | 36.87 | 29.29 | 16.67 | 17.17 | 33.84 | 14.65 | 26.26 | 25.76 | 33.33 | 59.09 | 25.76 | 11.11 | 40.4 | 22.73 | 63.13 | 46.46 |
| MZ203136 | 26.96 | 22.48 | 25.93 | 24.63 | 50.56 | 29.13 | 13.73 | 33.61 | 23.53 | 57.14 | 36.13 | 26.89 | 17.65 | 19.33 | 36.97 | 15.69 | 26.61 | 26.61 | 31.09 | 57.7 | 47.06 |
| MT018032 | 25.84 | 22.48 | 28.02 | 23.66 | 51.68 | 36.87 | 29.29 | 16.67 | 17.17 | 33.84 | 13.64 | 26.77 | 27.78 | 31.82 | 59.6 | 26.26 | 11.62 | 39.9 | 22.22 | 62.12 | 46.72 |
| MT018031 | 25.84 | 22.48 | 28.02 | 23.66 | 51.68 | 36.87 | 29.29 | 16.67 | 17.17 | 33.84 | 13.64 | 26.77 | 27.78 | 31.82 | 59.6 | 26.26 | 11.62 | 39.9 | 22.22 | 62.12 | 46.72 |
| MT018013 | 25.5 | 22.48 | 27.52 | 24.5 | 52.01 | 35.86 | 30.3 | 16.67 | 17.17 | 33.84 | 13.64 | 25.25 | 26.26 | 34.85 | 61.11 | 26.26 | 12.12 | 39.9 | 21.72 | 61.62 | 47.47 |
| MN422104 | 25.84 | 22.32 | 28.02 | 23.83 | 51.85 | 36.87 | 29.29 | 16.67 | 17.17 | 33.84 | 13.64 | 26.26 | 27.78 | 32.32 | 60.1 | 26.26 | 11.62 | 39.9 | 22.22 | 62.12 | 46.97 |
| MN824479 | 26.01 | 22.82 | 28.52 | 22.65 | 51.17 | 37.37 | 29.29 | 16.67 | 16.67 | 33.33 | 13.13 | 28.79 | 29.29 | 28.79 | 58.08 | 27.27 | 10.61 | 39.39 | 22.73 | 62.12 | 45.71 |
| MN824475 | 26.17 | 22.48 | 28.36 | 22.99 | 51.34 | 37.37 | 29.29 | 16.67 | 16.67 | 33.33 | 13.64 | 27.78 | 28.79 | 29.8 | 58.59 | 27.27 | 10.61 | 39.39 | 22.73 | 62.12 | 45.96 |
| MK434860 | 25.42 | 22.42 | 26.3 | 25.86 | 52.16 | 27.32 | 15.92 | 31.03 | 25.73 | 56.76 | 33.69 | 23.34 | 19.63 | 23.34 | 42.97 | 15.38 | 28.12 | 28.38 | 28.12 | 56.5 | 49.87 |
| KY100876 | 26.01 | 21.64 | 27.35 | 25 | 52.35 | 36.87 | 29.29 | 16.67 | 17.17 | 33.84 | 14.65 | 25.25 | 25.25 | 34.85 | 60.1 | 25.76 | 10.61 | 40.4 | 23.23 | 63.64 | 46.97 |
| MK205423 | 25.98 | 22.33 | 26.34 | 25.34 | 51.69 | 12.6 | 26.3 | 28.77 | 32.33 | 61.1 | 29.59 | 13.97 | 33.15 | 23.29 | 56.44 | 35.62 | 26.85 | 17.26 | 20.27 | 37.53 | 58.77 |
| KT389686 | 27.94 | 22.32 | 26.58 | 23.17 | 49.74 | 36.92 | 29.74 | 15.9 | 17.44 | 33.33 | 17.95 | 27.18 | 25.13 | 29.74 | 54.87 | 28.21 | 10.26 | 38.97 | 22.56 | 61.54 | 44.1 |
| KT389683 | 25.84 | 22.82 | 27.68 | 23.66 | 51.34 | 36.87 | 29.29 | 16.67 | 17.17 | 33.84 | 14.14 | 28.79 | 26.26 | 30.81 | 57.07 | 25.76 | 10.61 | 40.4 | 23.23 | 63.64 | 45.45 |
| KT389677 | 26.51 | 22.32 | 27.52 | 23.66 | 51.17 | 36.36 | 29.29 | 16.67 | 17.68 | 34.34 | 16.16 | 26.77 | 25.76 | 31.31 | 57.07 | 26.26 | 11.11 | 40.4 | 22.22 | 62.63 | 45.71 |
| KT389675 | 25.84 | 21.81 | 28.36 | 23.99 | 52.35 | 36.87 | 29.29 | 16.67 | 17.17 | 33.84 | 13.64 | 25.76 | 28.79 | 31.82 | 60.61 | 26.26 | 10.61 | 39.9 | 23.23 | 63.13 | 47.22 |
| LC916163 | 26.17 | 22.65 | 27.85 | 23.32 | 51.17 | 36.87 | 29.29 | 16.67 | 17.17 | 33.84 | 14.65 | 27.27 | 27.27 | 30.81 | 58.08 | 26.26 | 11.62 | 39.9 | 22.22 | 62.12 | 45.96 |
| LC916162 | 26.17 | 22.65 | 27.85 | 23.32 | 51.17 | 36.87 | 29.29 | 16.67 | 17.17 | 33.84 | 14.65 | 27.27 | 27.27 | 30.81 | 58.08 | 26.26 | 11.62 | 39.9 | 22.22 | 62.12 | 45.96 |
| LC905563 | 26.17 | 22.99 | 27.85 | 22.99 | 50.84 | 36.87 | 29.8 | 16.67 | 16.67 | 33.33 | 14.65 | 27.78 | 27.27 | 30.3 | 57.58 | 26.26 | 11.62 | 39.9 | 22.22 | 62.12 | 45.45 |
| LC905562 | 26.17 | 22.99 | 27.85 | 22.99 | 50.84 | 36.87 | 29.8 | 16.67 | 16.67 | 33.33 | 14.65 | 27.78 | 27.27 | 30.3 | 57.58 | 26.26 | 11.62 | 39.9 | 22.22 | 62.12 | 45.45 |
| LC905401 | 26.17 | 22.65 | 27.85 | 23.32 | 51.17 | 36.87 | 29.29 | 16.67 | 17.17 | 33.84 | 14.65 | 27.27 | 27.27 | 30.81 | 58.08 | 26.26 | 11.62 | 39.9 | 22.22 | 62.12 | 45.96 |
| PX354083 | 26.8 | 22.46 | 25.88 | 24.86 | 50.74 | 35.83 | 26.94 | 17.78 | 19.44 | 37.22 | 15.56 | 26.39 | 26.39 | 31.67 | 58.06 | 28.89 | 13.89 | 33.61 | 23.61 | 57.22 | 47.64 |
| PX254435 | 26.68 | 22.99 | 27.52 | 22.82 | 50.34 | 37.37 | 28.79 | 16.67 | 17.17 | 33.84 | 16.16 | 28.79 | 26.26 | 28.79 | 55.05 | 25.76 | 11.62 | 39.9 | 22.73 | 62.63 | 44.44 |
| OR531376 | 25.85 | 23.12 | 27.09 | 23.94 | 51.03 | 25.1 | 13.17 | 37.04 | 24.69 | 61.73 | 36.21 | 27.16 | 17.7 | 18.93 | 36.63 | 16.05 | 29.22 | 26.34 | 28.4 | 54.73 | 49.18 |
| OR531375 | 25.99 | 23.27 | 26.8 | 23.95 | 50.75 | 16.33 | 29.8 | 26.12 | 27.76 | 53.88 | 25.31 | 13.06 | 36.73 | 24.9 | 61.63 | 36.33 | 26.94 | 17.55 | 19.18 | 36.73 | 57.76 |
| OR531374 | 26.07 | 23.45 | 26.48 | 24 | 50.48 | 16.18 | 29.88 | 25.73 | 28.22 | 53.94 | 25.73 | 12.86 | 36.51 | 24.9 | 61.41 | 36.51 | 27.39 | 17.01 | 19.09 | 36.1 | 57.68 |
| OR531373 | 25.96 | 23.49 | 26.65 | 23.9 | 50.55 | 16.12 | 30.17 | 25.62 | 28.1 | 53.72 | 25.62 | 12.81 | 36.78 | 24.79 | 61.57 | 36.36 | 27.27 | 17.36 | 19.01 | 36.36 | 57.64 |
| OR161338 | 27.68 | 22.65 | 27.52 | 22.15 | 49.66 | 37.88 | 28.79 | 17.17 | 16.16 | 33.33 | 17.17 | 28.28 | 25.76 | 28.79 | 54.55 | 27.27 | 11.11 | 39.9 | 21.72 | 61.62 | 43.94 |
| OP937342 | 26.18 | 22.61 | 25.95 | 25.26 | 51.21 | 35.99 | 25.95 | 18.69 | 19.38 | 38.06 | 15.92 | 30.8 | 24.91 | 28.37 | 53.29 | 26.64 | 11.07 | 34.26 | 28.03 | 62.28 | 45.67 |
| OP810571 | 28.14 | 22.3 | 26.55 | 23.01 | 49.56 | 17.55 | 31.38 | 26.6 | 24.47 | 51.06 | 25.53 | 10.64 | 37.23 | 26.6 | 63.83 | 41.49 | 25 | 15.96 | 17.55 | 33.51 | 57.45 |
| OP810570 | 26.61 | 22.7 | 25.98 | 24.71 | 50.69 | 36.83 | 24.44 | 17.78 | 20.95 | 38.73 | 16.19 | 31.43 | 25.08 | 27.3 | 52.38 | 26.98 | 12.38 | 35.24 | 25.4 | 60.63 | 45.56 |
| OM793716 | 25.78 | 22.14 | 25.24 | 26.84 | 52.09 | 26.69 | 13.5 | 33.44 | 26.37 | 59.81 | 35.37 | 26.05 | 17.68 | 20.9 | 38.59 | 15.43 | 27.01 | 24.44 | 33.12 | 57.56 | 49.2 |
| OP103719 | 26.31 | 22.43 | 27.99 | 23.27 | 51.26 | 37.56 | 29.44 | 16.24 | 16.75 | 32.99 | 13.71 | 27.41 | 28.43 | 30.46 | 58.88 | 27.41 | 10.66 | 39.09 | 22.84 | 61.93 | 45.94 |
| MZ146784 | 26.94 | 23.06 | 27.61 | 22.39 | 50 | 17.17 | 28.79 | 26.77 | 27.27 | 54.04 | 25.76 | 11.62 | 39.9 | 22.73 | 62.63 | 37.88 | 28.79 | 16.16 | 17.17 | 33.33 | 58.33 |
| MZ161160 | 26.68 | 22.99 | 27.52 | 22.82 | 50.34 | 37.37 | 28.79 | 16.67 | 17.17 | 33.84 | 16.16 | 28.79 | 26.26 | 28.79 | 55.05 | 25.76 | 11.62 | 39.9 | 22.73 | 62.63 | 44.44 |
| MW149264 | 26.52 | 22.53 | 25.67 | 25.29 | 50.95 | 36.57 | 26 | 17.43 | 20 | 37.43 | 15.14 | 28.29 | 25.43 | 31.14 | 56.57 | 28 | 13.14 | 34 | 24.86 | 58.86 | 47 |
| MT222287 | 24.81 | 23.05 | 26.86 | 25.28 | 52.14 | 28.21 | 13.69 | 33.8 | 24.3 | 58.1 | 34.92 | 27.37 | 17.88 | 19.83 | 37.71 | 11.45 | 28.21 | 29.05 | 31.28 | 60.34 | 47.91 |
| KY742190 | 26.01 | 22.65 | 28.52 | 22.82 | 51.34 | 37.37 | 29.29 | 16.67 | 16.67 | 33.33 | 13.13 | 28.28 | 29.29 | 29.29 | 58.59 | 27.27 | 10.61 | 39.39 | 22.73 | 62.12 | 45.96 |
| PX245466 | 25.13 | 22.18 | 27.44 | 25.26 | 52.69 | 13.85 | 27.69 | 27.69 | 30.77 | 58.46 | 25.38 | 12.69 | 36.92 | 25 | 61.92 | 36.15 | 26.15 | 17.69 | 20 | 37.69 | 60.19 |
| PX245465 | 25.13 | 22.64 | 25.96 | 26.27 | 52.23 | 13.4 | 30.22 | 25.86 | 30.53 | 56.39 | 26.48 | 12.46 | 34.27 | 26.79 | 61.06 | 35.51 | 25.23 | 17.76 | 21.5 | 39.25 | 58.72 |
| PX245464 | 24.97 | 22.62 | 25.94 | 26.47 | 52.41 | 12.86 | 29.9 | 26.05 | 31.19 | 57.23 | 26.37 | 12.54 | 34.08 | 27.01 | 61.09 | 35.69 | 25.4 | 17.68 | 21.22 | 38.91 | 59.16 |
| PX245463 | 25.51 | 23.33 | 26.59 | 24.57 | 51.17 | 35.98 | 27.1 | 18.69 | 18.22 | 36.92 | 14.02 | 29.91 | 26.17 | 29.91 | 56.07 | 26.17 | 13.08 | 35.05 | 25.7 | 60.75 | 46.5 |
| PX138673 | 27.62 | 21.3 | 26.4 | 24.67 | 51.07 | 37.61 | 25.08 | 17.74 | 19.57 | 37.31 | 16.82 | 25.69 | 26.91 | 30.58 | 57.49 | 28.44 | 13.15 | 34.56 | 23.85 | 58.41 | 47.4 |
| PX138672 | 27.52 | 21.24 | 26.33 | 24.92 | 51.25 | 17.59 | 26.38 | 25.73 | 30.29 | 56.03 | 28.34 | 12.05 | 35.18 | 24.43 | 59.61 | 36.81 | 24.76 | 18.24 | 20.2 | 38.44 | 57.82 |
| PX138671 | 27.62 | 21.3 | 26.4 | 24.67 | 51.07 | 37.61 | 25.08 | 17.74 | 19.57 | 37.31 | 16.82 | 25.69 | 26.91 | 30.58 | 57.49 | 28.44 | 13.15 | 34.56 | 23.85 | 58.41 | 47.4 |
| PX138670 | 27.62 | 21.3 | 26.4 | 24.67 | 51.07 | 37.61 | 25.08 | 17.74 | 19.57 | 37.31 | 16.82 | 25.69 | 26.91 | 30.58 | 57.49 | 28.44 | 13.15 | 34.56 | 23.85 | 58.41 | 47.4 |
| PX138669 | 27.62 | 21.3 | 26.4 | 24.67 | 51.07 | 37.61 | 25.08 | 17.74 | 19.57 | 37.31 | 16.82 | 25.69 | 26.91 | 30.58 | 57.49 | 28.44 | 13.15 | 34.56 | 23.85 | 58.41 | 47.4 |
| PX138668 | 27.62 | 21.3 | 26.4 | 24.67 | 51.07 | 37.61 | 25.08 | 17.74 | 19.57 | 37.31 | 16.82 | 25.69 | 26.91 | 30.58 | 57.49 | 28.44 | 13.15 | 34.56 | 23.85 | 58.41 | 47.4 |
| PV691788 | 25.74 | 22.34 | 25.64 | 26.28 | 51.91 | 35.46 | 25.56 | 17.57 | 21.41 | 38.98 | 14.38 | 28.75 | 25.56 | 31.31 | 56.87 | 27.16 | 12.78 | 33.87 | 26.2 | 60.06 | 47.92 |
| PV021910 | 23.59 | 26.5 | 24.77 | 25.14 | 49.91 | 26.78 | 36.34 | 19.95 | 16.94 | 36.89 | 13.66 | 28.14 | 25.14 | 33.06 | 58.2 | 30.33 | 15.03 | 29.23 | 25.41 | 54.64 | 47.54 |
| PP785985 | 27.12 | 22.7 | 25.61 | 24.56 | 50.17 | 28.32 | 11.54 | 34.27 | 25.87 | 60.14 | 36.01 | 26.22 | 18.53 | 19.23 | 37.76 | 17.13 | 30.07 | 24.13 | 28.67 | 52.8 | 48.95 |
| PP389363 | 27.68 | 22.65 | 27.52 | 22.15 | 49.66 | 37.88 | 28.79 | 17.17 | 16.16 | 33.33 | 17.17 | 28.28 | 25.76 | 28.79 | 54.55 | 27.27 | 11.11 | 39.9 | 21.72 | 61.62 | 43.94 |
| PP389362 | 27.68 | 22.65 | 27.52 | 22.15 | 49.66 | 37.88 | 28.79 | 17.17 | 16.16 | 33.33 | 17.17 | 28.28 | 25.76 | 28.79 | 54.55 | 27.27 | 11.11 | 39.9 | 21.72 | 61.62 | 43.94 |
| PP389361 | 27.68 | 22.65 | 27.52 | 22.15 | 49.66 | 37.88 | 28.79 | 17.17 | 16.16 | 33.33 | 17.17 | 28.28 | 25.76 | 28.79 | 54.55 | 27.27 | 11.11 | 39.9 | 21.72 | 61.62 | 43.94 |
| PP389360 | 27.68 | 22.65 | 27.52 | 22.15 | 49.66 | 37.88 | 28.79 | 17.17 | 16.16 | 33.33 | 17.17 | 28.28 | 25.76 | 28.79 | 54.55 | 27.27 | 11.11 | 39.9 | 21.72 | 61.62 | 43.94 |
| PP259445 | 26.42 | 22.3 | 27.1 | 24.19 | 51.29 | 36.6 | 29.38 | 16.49 | 17.53 | 34.02 | 15.98 | 25.26 | 25.77 | 32.99 | 58.76 | 26.29 | 12.37 | 39.18 | 22.16 | 61.34 | 46.39 |
| OR672525 | 25.98 | 22.3 | 25.86 | 25.86 | 51.73 | 27.76 | 13.04 | 34.11 | 25.08 | 59.2 | 34.78 | 27.09 | 18.73 | 19.4 | 38.13 | 15.38 | 26.76 | 24.75 | 33.11 | 57.86 | 48.66 |
| OR572168 | 26.85 | 22.65 | 27.68 | 22.82 | 50.5 | 37.37 | 28.79 | 16.67 | 17.17 | 33.84 | 16.67 | 28.28 | 26.77 | 28.28 | 55.05 | 25.76 | 11.11 | 39.9 | 23.23 | 63.13 | 44.44 |
| OR572167 | 26.85 | 22.65 | 27.68 | 22.82 | 50.5 | 37.37 | 28.79 | 16.67 | 17.17 | 33.84 | 16.67 | 28.28 | 26.77 | 28.28 | 55.05 | 25.76 | 11.11 | 39.9 | 23.23 | 63.13 | 44.44 |
| OR572166 | 27.01 | 23.15 | 27.68 | 22.15 | 49.83 | 37.37 | 28.79 | 16.67 | 17.17 | 33.84 | 17.17 | 29.29 | 26.77 | 26.77 | 53.54 | 25.76 | 11.62 | 39.9 | 22.73 | 62.63 | 43.69 |
| OR572165 | 26.85 | 22.65 | 27.68 | 22.82 | 50.5 | 37.37 | 28.79 | 16.67 | 17.17 | 33.84 | 16.67 | 28.28 | 26.77 | 28.28 | 55.05 | 25.76 | 11.11 | 39.9 | 23.23 | 63.13 | 44.44 |
| OR572164 | 26.85 | 22.65 | 27.68 | 22.82 | 50.5 | 37.37 | 28.79 | 16.67 | 17.17 | 33.84 | 16.67 | 28.28 | 26.77 | 28.28 | 55.05 | 25.76 | 11.11 | 39.9 | 23.23 | 63.13 | 44.44 |
| OR572163 | 26.85 | 22.65 | 27.68 | 22.82 | 50.5 | 37.37 | 28.79 | 16.67 | 17.17 | 33.84 | 16.67 | 28.28 | 26.77 | 28.28 | 55.05 | 25.76 | 11.11 | 39.9 | 23.23 | 63.13 | 44.44 |
| OR572162 | 26.85 | 22.65 | 27.68 | 22.82 | 50.5 | 37.37 | 28.79 | 16.67 | 17.17 | 33.84 | 16.67 | 28.28 | 26.77 | 28.28 | 55.05 | 25.76 | 11.11 | 39.9 | 23.23 | 63.13 | 44.44 |
| OR572161 | 26.85 | 22.65 | 27.68 | 22.82 | 50.5 | 37.37 | 28.79 | 16.67 | 17.17 | 33.84 | 16.67 | 28.28 | 26.77 | 28.28 | 55.05 | 25.76 | 11.11 | 39.9 | 23.23 | 63.13 | 44.44 |
| OR572160 | 26.85 | 22.65 | 27.68 | 22.82 | 50.5 | 37.37 | 28.79 | 16.67 | 17.17 | 33.84 | 16.67 | 28.28 | 26.77 | 28.28 | 55.05 | 25.76 | 11.11 | 39.9 | 23.23 | 63.13 | 44.44 |
| OR572159 | 26.85 | 22.65 | 27.68 | 22.82 | 50.5 | 37.37 | 28.79 | 16.67 | 17.17 | 33.84 | 16.67 | 28.28 | 26.77 | 28.28 | 55.05 | 25.76 | 11.11 | 39.9 | 23.23 | 63.13 | 44.44 |
| OR572158 | 26.85 | 22.65 | 27.68 | 22.82 | 50.5 | 37.37 | 28.79 | 16.67 | 17.17 | 33.84 | 16.67 | 28.28 | 26.77 | 28.28 | 55.05 | 25.76 | 11.11 | 39.9 | 23.23 | 63.13 | 44.44 |
| OR572157 | 26.85 | 22.65 | 27.68 | 22.82 | 50.5 | 37.37 | 28.79 | 16.67 | 17.17 | 33.84 | 16.67 | 28.28 | 26.77 | 28.28 | 55.05 | 25.76 | 11.11 | 39.9 | 23.23 | 63.13 | 44.44 |
| OR572156 | 26.85 | 22.65 | 27.68 | 22.82 | 50.5 | 37.37 | 28.79 | 16.67 | 17.17 | 33.84 | 16.67 | 28.28 | 26.77 | 28.28 | 55.05 | 25.76 | 11.11 | 39.9 | 23.23 | 63.13 | 44.44 |
| OR572155 | 26.85 | 22.65 | 27.68 | 22.82 | 50.5 | 37.37 | 28.79 | 16.67 | 17.17 | 33.84 | 16.67 | 28.28 | 26.77 | 28.28 | 55.05 | 25.76 | 11.11 | 39.9 | 23.23 | 63.13 | 44.44 |
| OR572154 | 26.85 | 22.65 | 27.68 | 22.82 | 50.5 | 37.37 | 28.79 | 16.67 | 17.17 | 33.84 | 16.67 | 28.28 | 26.77 | 28.28 | 55.05 | 25.76 | 11.11 | 39.9 | 23.23 | 63.13 | 44.44 |
| OR572153 | 26.85 | 22.65 | 27.68 | 22.82 | 50.5 | 37.37 | 28.79 | 16.67 | 17.17 | 33.84 | 16.67 | 28.28 | 26.77 | 28.28 | 55.05 | 25.76 | 11.11 | 39.9 | 23.23 | 63.13 | 44.44 |
| OR572152 | 26.85 | 22.65 | 27.68 | 22.82 | 50.5 | 37.37 | 28.79 | 16.67 | 17.17 | 33.84 | 16.67 | 28.28 | 26.77 | 28.28 | 55.05 | 25.76 | 11.11 | 39.9 | 23.23 | 63.13 | 44.44 |
| OR572151 | 26.85 | 22.65 | 27.68 | 22.82 | 50.5 | 37.37 | 28.79 | 16.67 | 17.17 | 33.84 | 16.67 | 28.28 | 26.77 | 28.28 | 55.05 | 25.76 | 11.11 | 39.9 | 23.23 | 63.13 | 44.44 |
| OR572150 | 26.85 | 22.65 | 27.68 | 22.82 | 50.5 | 37.37 | 28.79 | 16.67 | 17.17 | 33.84 | 16.67 | 28.28 | 26.77 | 28.28 | 55.05 | 25.76 | 11.11 | 39.9 | 23.23 | 63.13 | 44.44 |
| OR572149 | 26.85 | 22.65 | 27.68 | 22.82 | 50.5 | 37.37 | 28.79 | 16.67 | 17.17 | 33.84 | 16.67 | 28.28 | 26.77 | 28.28 | 55.05 | 25.76 | 11.11 | 39.9 | 23.23 | 63.13 | 44.44 |
| OR572148 | 26.85 | 22.65 | 27.68 | 22.82 | 50.5 | 37.37 | 28.79 | 16.67 | 17.17 | 33.84 | 16.67 | 28.28 | 26.77 | 28.28 | 55.05 | 25.76 | 11.11 | 39.9 | 23.23 | 63.13 | 44.44 |
| OR572147 | 26.85 | 22.65 | 27.68 | 22.82 | 50.5 | 37.37 | 28.79 | 16.67 | 17.17 | 33.84 | 16.67 | 28.28 | 26.77 | 28.28 | 55.05 | 25.76 | 11.11 | 39.9 | 23.23 | 63.13 | 44.44 |
| OR572146 | 26.85 | 22.65 | 27.68 | 22.82 | 50.5 | 37.37 | 28.79 | 16.67 | 17.17 | 33.84 | 16.67 | 28.28 | 26.77 | 28.28 | 55.05 | 25.76 | 11.11 | 39.9 | 23.23 | 63.13 | 44.44 |
| OR572145 | 26.85 | 22.65 | 27.68 | 22.82 | 50.5 | 37.37 | 28.79 | 16.67 | 17.17 | 33.84 | 16.67 | 28.28 | 26.77 | 28.28 | 55.05 | 25.76 | 11.11 | 39.9 | 23.23 | 63.13 | 44.44 |
| OR572144 | 26.85 | 22.65 | 27.68 | 22.82 | 50.5 | 37.37 | 28.79 | 16.67 | 17.17 | 33.84 | 16.67 | 28.28 | 26.77 | 28.28 | 55.05 | 25.76 | 11.11 | 39.9 | 23.23 | 63.13 | 44.44 |
| OR572143 | 26.85 | 22.65 | 27.68 | 22.82 | 50.5 | 37.37 | 28.79 | 16.67 | 17.17 | 33.84 | 16.67 | 28.28 | 26.77 | 28.28 | 55.05 | 25.76 | 11.11 | 39.9 | 23.23 | 63.13 | 44.44 |
| OR572142 | 26.85 | 22.65 | 27.68 | 22.82 | 50.5 | 37.37 | 28.79 | 16.67 | 17.17 | 33.84 | 16.67 | 28.28 | 26.77 | 28.28 | 55.05 | 25.76 | 11.11 | 39.9 | 23.23 | 63.13 | 44.44 |
| OR572141 | 26.85 | 22.65 | 27.68 | 22.82 | 50.5 | 37.37 | 28.79 | 16.67 | 17.17 | 33.84 | 16.67 | 28.28 | 26.77 | 28.28 | 55.05 | 25.76 | 11.11 | 39.9 | 23.23 | 63.13 | 44.44 |
| OR572140 | 26.85 | 22.65 | 27.68 | 22.82 | 50.5 | 37.37 | 28.79 | 16.67 | 17.17 | 33.84 | 16.67 | 28.28 | 26.77 | 28.28 | 55.05 | 25.76 | 11.11 | 39.9 | 23.23 | 63.13 | 44.44 |
| OR572139 | 26.85 | 22.65 | 27.68 | 22.82 | 50.5 | 37.37 | 28.79 | 16.67 | 17.17 | 33.84 | 16.67 | 28.28 | 26.77 | 28.28 | 55.05 | 25.76 | 11.11 | 39.9 | 23.23 | 63.13 | 44.44 |
| OR572138 | 26.85 | 22.65 | 27.68 | 22.82 | 50.5 | 37.37 | 28.79 | 16.67 | 17.17 | 33.84 | 16.67 | 28.28 | 26.77 | 28.28 | 55.05 | 25.76 | 11.11 | 39.9 | 23.23 | 63.13 | 44.44 |
| OR572137 | 26.85 | 22.65 | 27.68 | 22.82 | 50.5 | 37.37 | 28.79 | 16.67 | 17.17 | 33.84 | 16.67 | 28.28 | 26.77 | 28.28 | 55.05 | 25.76 | 11.11 | 39.9 | 23.23 | 63.13 | 44.44 |
| OR572136 | 26.85 | 22.65 | 27.68 | 22.82 | 50.5 | 37.37 | 28.79 | 16.67 | 17.17 | 33.84 | 16.67 | 28.28 | 26.77 | 28.28 | 55.05 | 25.76 | 11.11 | 39.9 | 23.23 | 63.13 | 44.44 |
| OR572135 | 26.85 | 22.65 | 27.68 | 22.82 | 50.5 | 37.37 | 28.79 | 16.67 | 17.17 | 33.84 | 16.67 | 28.28 | 26.77 | 28.28 | 55.05 | 25.76 | 11.11 | 39.9 | 23.23 | 63.13 | 44.44 |
| OR572134 | 26.85 | 22.65 | 27.68 | 22.82 | 50.5 | 37.37 | 28.79 | 16.67 | 17.17 | 33.84 | 16.67 | 28.28 | 26.77 | 28.28 | 55.05 | 25.76 | 11.11 | 39.9 | 23.23 | 63.13 | 44.44 |
| OR572133 | 26.85 | 22.65 | 27.68 | 22.82 | 50.5 | 37.37 | 28.79 | 16.67 | 17.17 | 33.84 | 16.67 | 28.28 | 26.77 | 28.28 | 55.05 | 25.76 | 11.11 | 39.9 | 23.23 | 63.13 | 44.44 |
| OR572132 | 26.85 | 22.65 | 27.68 | 22.82 | 50.5 | 37.37 | 28.79 | 16.67 | 17.17 | 33.84 | 16.67 | 28.28 | 26.77 | 28.28 | 55.05 | 25.76 | 11.11 | 39.9 | 23.23 | 63.13 | 44.44 |
| OR572131 | 26.85 | 22.65 | 27.68 | 22.82 | 50.5 | 37.37 | 28.79 | 16.67 | 17.17 | 33.84 | 16.67 | 28.28 | 26.77 | 28.28 | 55.05 | 25.76 | 11.11 | 39.9 | 23.23 | 63.13 | 44.44 |
| OR572130 | 26.85 | 22.65 | 27.68 | 22.82 | 50.5 | 37.37 | 28.79 | 16.67 | 17.17 | 33.84 | 16.67 | 28.28 | 26.77 | 28.28 | 55.05 | 25.76 | 11.11 | 39.9 | 23.23 | 63.13 | 44.44 |
| OR572129 | 26.85 | 22.65 | 27.68 | 22.82 | 50.5 | 37.37 | 28.79 | 16.67 | 17.17 | 33.84 | 16.67 | 28.28 | 26.77 | 28.28 | 55.05 | 25.76 | 11.11 | 39.9 | 23.23 | 63.13 | 44.44 |
| OR572128 | 26.85 | 22.65 | 27.68 | 22.82 | 50.5 | 37.37 | 28.79 | 16.67 | 17.17 | 33.84 | 16.67 | 28.28 | 26.77 | 28.28 | 55.05 | 25.76 | 11.11 | 39.9 | 23.23 | 63.13 | 44.44 |
| OR572127 | 26.85 | 22.65 | 27.68 | 22.82 | 50.5 | 37.37 | 28.79 | 16.67 | 17.17 | 33.84 | 16.67 | 28.28 | 26.77 | 28.28 | 55.05 | 25.76 | 11.11 | 39.9 | 23.23 | 63.13 | 44.44 |
| OR572126 | 26.85 | 22.65 | 27.68 | 22.82 | 50.5 | 37.37 | 28.79 | 16.67 | 17.17 | 33.84 | 16.67 | 28.28 | 26.77 | 28.28 | 55.05 | 25.76 | 11.11 | 39.9 | 23.23 | 63.13 | 44.44 |
| OR572125 | 26.85 | 22.65 | 27.68 | 22.82 | 50.5 | 37.37 | 28.79 | 16.67 | 17.17 | 33.84 | 16.67 | 28.28 | 26.77 | 28.28 | 55.05 | 25.76 | 11.11 | 39.9 | 23.23 | 63.13 | 44.44 |
| OR572124 | 26.85 | 22.65 | 27.68 | 22.82 | 50.5 | 37.37 | 28.79 | 16.67 | 17.17 | 33.84 | 16.67 | 28.28 | 26.77 | 28.28 | 55.05 | 25.76 | 11.11 | 39.9 | 23.23 | 63.13 | 44.44 |
| OR572123 | 26.85 | 22.65 | 27.68 | 22.82 | 50.5 | 37.37 | 28.79 | 16.67 | 17.17 | 33.84 | 16.67 | 28.28 | 26.77 | 28.28 | 55.05 | 25.76 | 11.11 | 39.9 | 23.23 | 63.13 | 44.44 |
| OR572122 | 26.85 | 22.65 | 27.68 | 22.82 | 50.5 | 37.37 | 28.79 | 16.67 | 17.17 | 33.84 | 16.67 | 28.28 | 26.77 | 28.28 | 55.05 | 25.76 | 11.11 | 39.9 | 23.23 | 63.13 | 44.44 |
| OR572121 | 26.85 | 22.65 | 27.68 | 22.82 | 50.5 | 37.37 | 28.79 | 16.67 | 17.17 | 33.84 | 16.67 | 28.28 | 26.77 | 28.28 | 55.05 | 25.76 | 11.11 | 39.9 | 23.23 | 63.13 | 44.44 |
| OR572120 | 26.85 | 22.65 | 27.68 | 22.82 | 50.5 | 37.37 | 28.79 | 16.67 | 17.17 | 33.84 | 16.67 | 28.28 | 26.77 | 28.28 | 55.05 | 25.76 | 11.11 | 39.9 | 23.23 | 63.13 | 44.44 |
| OR572119 | 26.85 | 22.65 | 27.68 | 22.82 | 50.5 | 37.37 | 28.79 | 16.67 | 17.17 | 33.84 | 16.67 | 28.28 | 26.77 | 28.28 | 55.05 | 25.76 | 11.11 | 39.9 | 23.23 | 63.13 | 44.44 |
| OR572118 | 26.85 | 22.65 | 27.68 | 22.82 | 50.5 | 37.37 | 28.79 | 16.67 | 17.17 | 33.84 | 16.67 | 28.28 | 26.77 | 28.28 | 55.05 | 25.76 | 11.11 | 39.9 | 23.23 | 63.13 | 44.44 |
| OR572117 | 26.85 | 22.65 | 27.68 | 22.82 | 50.5 | 37.37 | 28.79 | 16.67 | 17.17 | 33.84 | 16.67 | 28.28 | 26.77 | 28.28 | 55.05 | 25.76 | 11.11 | 39.9 | 23.23 | 63.13 | 44.44 |
| OR572116 | 26.85 | 22.65 | 27.68 | 22.82 | 50.5 | 37.37 | 28.79 | 16.67 | 17.17 | 33.84 | 16.67 | 28.28 | 26.77 | 28.28 | 55.05 | 25.76 | 11.11 | 39.9 | 23.23 | 63.13 | 44.44 |
| OR572115 | 26.85 | 22.65 | 27.68 | 22.82 | 50.5 | 37.37 | 28.79 | 16.67 | 17.17 | 33.84 | 16.67 | 28.28 | 26.77 | 28.28 | 55.05 | 25.76 | 11.11 | 39.9 | 23.23 | 63.13 | 44.44 |
| OR572114 | 26.85 | 22.65 | 27.68 | 22.82 | 50.5 | 37.37 | 28.79 | 16.67 | 17.17 | 33.84 | 16.67 | 28.28 | 26.77 | 28.28 | 55.05 | 25.76 | 11.11 | 39.9 | 23.23 | 63.13 | 44.44 |
| OR572113 | 26.85 | 22.65 | 27.68 | 22.82 | 50.5 | 37.37 | 28.79 | 16.67 | 17.17 | 33.84 | 16.67 | 28.28 | 26.77 | 28.28 | 55.05 | 25.76 | 11.11 | 39.9 | 23.23 | 63.13 | 44.44 |
| OR572112 | 26.85 | 22.65 | 27.68 | 22.82 | 50.5 | 37.37 | 28.79 | 16.67 | 17.17 | 33.84 | 16.67 | 28.28 | 26.77 | 28.28 | 55.05 | 25.76 | 11.11 | 39.9 | 23.23 | 63.13 | 44.44 |
| OR572111 | 26.85 | 22.65 | 27.68 | 22.82 | 50.5 | 37.37 | 28.79 | 16.67 | 17.17 | 33.84 | 16.67 | 28.28 | 26.77 | 28.28 | 55.05 | 25.76 | 11.11 | 39.9 | 23.23 | 63.13 | 44.44 |
| OR572110 | 26.85 | 22.65 | 27.68 | 22.82 | 50.5 | 37.37 | 28.79 | 16.67 | 17.17 | 33.84 | 16.67 | 28.28 | 26.77 | 28.28 | 55.05 | 25.76 | 11.11 | 39.9 | 23.23 | 63.13 | 44.44 |
| OR572109 | 26.85 | 22.65 | 27.68 | 22.82 | 50.5 | 37.37 | 28.79 | 16.67 | 17.17 | 33.84 | 16.67 | 28.28 | 26.77 | 28.28 | 55.05 | 25.76 | 11.11 | 39.9 | 23.23 | 63.13 | 44.44 |
| OR572108 | 26.85 | 22.65 | 27.68 | 22.82 | 50.5 | 37.37 | 28.79 | 16.67 | 17.17 | 33.84 | 16.67 | 28.28 | 26.77 | 28.28 | 55.05 | 25.76 | 11.11 | 39.9 | 23.23 | 63.13 | 44.44 |
| OR572107 | 26.85 | 22.65 | 27.68 | 22.82 | 50.5 | 37.37 | 28.79 | 16.67 | 17.17 | 33.84 | 16.67 | 28.28 | 26.77 | 28.28 | 55.05 | 25.76 | 11.11 | 39.9 | 23.23 | 63.13 | 44.44 |
| OR572106 | 26.85 | 22.65 | 27.68 | 22.82 | 50.5 | 37.37 | 28.79 | 16.67 | 17.17 | 33.84 | 16.67 | 28.28 | 26.77 | 28.28 | 55.05 | 25.76 | 11.11 | 39.9 | 23.23 | 63.13 | 44.44 |
| OR572105 | 26.85 | 22.65 | 27.68 | 22.82 | 50.5 | 37.37 | 28.79 | 16.67 | 17.17 | 33.84 | 16.67 | 28.28 | 26.77 | 28.28 | 55.05 | 25.76 | 11.11 | 39.9 | 23.23 | 63.13 | 44.44 |
| OR572104 | 26.85 | 22.65 | 27.68 | 22.82 | 50.5 | 37.37 | 28.79 | 16.67 | 17.17 | 33.84 | 16.67 | 28.28 | 26.77 | 28.28 | 55.05 | 25.76 | 11.11 | 39.9 | 23.23 | 63.13 | 44.44 |
| OR545224 | 27.15 | 22.62 | 25.52 | 24.71 | 50.23 | 28.22 | 11.5 | 34.15 | 26.13 | 60.28 | 35.89 | 26.13 | 18.82 | 19.16 | 37.98 | 17.42 | 29.97 | 23.69 | 28.92 | 52.61 | 49.13 |
| OR545223 | 26.83 | 22.51 | 25.39 | 25.28 | 50.67 | 16.67 | 29 | 24 | 30.33 | 54.33 | 28 | 12.33 | 33.67 | 26 | 59.67 | 36 | 26.33 | 18.33 | 19.33 | 37.67 | 57 |
| OQ326504 | 27.12 | 22.44 | 25.16 | 25.27 | 50.44 | 16.99 | 29.41 | 24.51 | 29.08 | 53.59 | 27.78 | 12.42 | 33.01 | 26.8 | 59.8 | 36.6 | 25.49 | 17.97 | 19.93 | 37.91 | 56.7 |
| OQ271774 | 27.25 | 21.91 | 26.73 | 24.11 | 50.84 | 37.11 | 27.04 | 17.61 | 18.24 | 35.85 | 16.04 | 24.21 | 27.67 | 32.08 | 59.75 | 28.62 | 14.47 | 34.91 | 22.01 | 56.92 | 47.8 |
| OQ343380 | 26.01 | 21.98 | 27.52 | 24.5 | 52.01 | 36.87 | 29.29 | 16.67 | 17.17 | 33.84 | 14.65 | 25.76 | 25.76 | 33.84 | 59.6 | 25.76 | 11.11 | 40.4 | 22.73 | 63.13 | 46.72 |
| OQ190092 | 26.89 | 22.6 | 25.86 | 24.65 | 50.51 | 29.13 | 14.01 | 33.33 | 23.53 | 56.86 | 35.85 | 27.17 | 17.65 | 19.33 | 36.97 | 15.69 | 26.61 | 26.61 | 31.09 | 57.7 | 46.92 |
| OQ221891 | 22.48 | 26.96 | 24.72 | 25.84 | 50.56 | 26.89 | 35.85 | 19.61 | 17.65 | 37.25 | 14.01 | 29.13 | 23.53 | 33.33 | 56.86 | 26.61 | 15.69 | 31.09 | 26.61 | 57.7 | 47.06 |
| OM982463 | 26.9 | 22.6 | 25.36 | 25.14 | 50.5 | 27.48 | 12.25 | 33.44 | 26.82 | 60.26 | 36.09 | 26.16 | 18.21 | 19.54 | 37.75 | 16.89 | 29.47 | 24.5 | 29.14 | 53.64 | 49.01 |
| OM982462 | 26.9 | 22.54 | 25.45 | 25.11 | 50.56 | 27.85 | 12.08 | 33.56 | 26.51 | 60.07 | 36.24 | 26.17 | 18.12 | 19.46 | 37.58 | 16.78 | 29.53 | 24.5 | 29.19 | 53.69 | 48.83 |
| OM982461 | 26.92 | 22.47 | 25.47 | 25.14 | 50.61 | 27.76 | 12.04 | 33.44 | 26.76 | 60.2 | 36.45 | 26.09 | 18.06 | 19.4 | 37.46 | 16.72 | 29.43 | 24.75 | 29.1 | 53.85 | 48.83 |
| OM982460 | 26.92 | 22.47 | 25.47 | 25.14 | 50.61 | 27.76 | 12.04 | 33.44 | 26.76 | 60.2 | 36.45 | 26.09 | 18.06 | 19.4 | 37.46 | 16.72 | 29.43 | 24.75 | 29.1 | 53.85 | 48.83 |
| OM982459 | 26.85 | 22.54 | 25.41 | 25.19 | 50.61 | 27.57 | 12.29 | 33.55 | 26.58 | 60.13 | 36.21 | 26.25 | 17.94 | 19.6 | 37.54 | 16.94 | 29.24 | 24.58 | 29.24 | 53.82 | 48.84 |
| OM982458 | 26.9 | 22.54 | 25.45 | 25.11 | 50.56 | 27.85 | 12.08 | 33.56 | 26.51 | 60.07 | 36.24 | 26.17 | 18.12 | 19.46 | 37.58 | 16.78 | 29.53 | 24.5 | 29.19 | 53.69 | 48.83 |
| OM982457 | 26.9 | 22.54 | 25.45 | 25.11 | 50.56 | 27.85 | 12.08 | 33.56 | 26.51 | 60.07 | 36.24 | 26.17 | 18.12 | 19.46 | 37.58 | 16.78 | 29.53 | 24.5 | 29.19 | 53.69 | 48.83 |
| MZ673654 | 25.98 | 22.8 | 24.81 | 26.41 | 51.22 | 15.61 | 31.21 | 23.57 | 29.62 | 53.18 | 26.43 | 12.74 | 33.44 | 27.39 | 60.83 | 35.99 | 24.52 | 17.52 | 21.97 | 39.49 | 57.01 |
| MZ673653 | 25.66 | 22.8 | 25.13 | 26.41 | 51.54 | 15.29 | 31.21 | 23.89 | 29.62 | 53.5 | 25.8 | 12.74 | 34.08 | 27.39 | 61.46 | 35.99 | 24.52 | 17.52 | 21.97 | 39.49 | 57.48 |
| MZ673652 | 25.87 | 22.91 | 24.81 | 26.41 | 51.22 | 15.92 | 30.89 | 23.57 | 29.62 | 53.18 | 25.8 | 13.06 | 33.76 | 27.39 | 61.15 | 35.99 | 24.84 | 17.2 | 21.97 | 39.17 | 57.17 |
| MW531666 | 26.68 | 22.82 | 27.68 | 22.82 | 50.5 | 36.87 | 29.29 | 16.67 | 17.17 | 33.84 | 16.67 | 28.28 | 26.77 | 28.28 | 55.05 | 25.76 | 11.11 | 39.9 | 23.23 | 63.13 | 44.44 |
| MW531665 | 26.85 | 22.65 | 27.68 | 22.82 | 50.5 | 37.37 | 28.79 | 16.67 | 17.17 | 33.84 | 16.67 | 28.28 | 26.77 | 28.28 | 55.05 | 25.76 | 11.11 | 39.9 | 23.23 | 63.13 | 44.44 |
| MW531664 | 26.68 | 22.82 | 27.68 | 22.82 | 50.5 | 36.87 | 29.29 | 16.67 | 17.17 | 33.84 | 16.67 | 28.28 | 26.77 | 28.28 | 55.05 | 25.76 | 11.11 | 39.9 | 23.23 | 63.13 | 44.44 |
| MW531663 | 26.68 | 22.82 | 27.52 | 22.99 | 50.5 | 37.37 | 28.79 | 16.67 | 17.17 | 33.84 | 16.67 | 28.28 | 26.26 | 28.79 | 55.05 | 25.25 | 11.62 | 39.9 | 23.23 | 63.13 | 44.44 |
| MW531662 | 26.68 | 22.82 | 27.52 | 22.99 | 50.5 | 37.37 | 28.79 | 16.67 | 17.17 | 33.84 | 16.67 | 28.28 | 26.26 | 28.79 | 55.05 | 25.25 | 11.62 | 39.9 | 23.23 | 63.13 | 44.44 |
| MW531661 | 26.85 | 22.65 | 27.68 | 22.82 | 50.5 | 37.37 | 28.79 | 16.67 | 17.17 | 33.84 | 16.67 | 28.28 | 26.77 | 28.28 | 55.05 | 25.76 | 11.11 | 39.9 | 23.23 | 63.13 | 44.44 |
| MW321597 | 26.85 | 22.65 | 27.68 | 22.82 | 50.5 | 37.37 | 28.79 | 16.67 | 17.17 | 33.84 | 16.67 | 28.28 | 26.77 | 28.28 | 55.05 | 25.76 | 11.11 | 39.9 | 23.23 | 63.13 | 44.44 |
| MW853801 | 27.35 | 22.82 | 28.02 | 21.81 | 49.83 | 37.88 | 28.79 | 17.68 | 15.66 | 33.33 | 16.16 | 28.79 | 26.77 | 28.28 | 55.05 | 27.27 | 11.11 | 39.9 | 21.72 | 61.62 | 44.19 |
| MW853800 | 27.68 | 22.65 | 27.52 | 22.15 | 49.66 | 37.88 | 28.79 | 17.17 | 16.16 | 33.33 | 17.17 | 28.28 | 25.76 | 28.79 | 54.55 | 27.27 | 11.11 | 39.9 | 21.72 | 61.62 | 43.94 |
| MW853799 | 27.68 | 22.65 | 27.52 | 22.15 | 49.66 | 37.88 | 28.79 | 17.17 | 16.16 | 33.33 | 17.17 | 28.28 | 25.76 | 28.79 | 54.55 | 27.27 | 11.11 | 39.9 | 21.72 | 61.62 | 43.94 |
| MW853798 | 27.68 | 22.65 | 27.52 | 22.15 | 49.66 | 37.88 | 28.79 | 17.17 | 16.16 | 33.33 | 17.17 | 28.28 | 25.76 | 28.79 | 54.55 | 27.27 | 11.11 | 39.9 | 21.72 | 61.62 | 43.94 |
| MW853797 | 27.52 | 22.32 | 28.86 | 21.31 | 50.17 | 37.88 | 28.28 | 18.18 | 15.66 | 33.84 | 16.16 | 28.28 | 28.28 | 27.27 | 55.56 | 27.78 | 10.61 | 40.4 | 21.21 | 61.62 | 44.7 |
| LR983949 | 26.01 | 22.33 | 26.63 | 25.03 | 51.66 | 27.68 | 10.7 | 35.79 | 25.83 | 61.62 | 36.16 | 26.94 | 18.45 | 18.45 | 36.9 | 14.02 | 29.15 | 25.83 | 31 | 56.83 | 49.26 |
| MN983695 | 26.51 | 21.48 | 27.18 | 24.83 | 52.01 | 36.87 | 29.29 | 16.67 | 17.17 | 33.84 | 15.66 | 24.24 | 25.25 | 34.85 | 60.1 | 26.26 | 11.11 | 39.9 | 22.73 | 62.63 | 46.97 |
| MN983694 | 26.51 | 21.48 | 27.18 | 24.83 | 52.01 | 36.87 | 29.29 | 16.67 | 17.17 | 33.84 | 15.66 | 24.24 | 25.25 | 34.85 | 60.1 | 26.26 | 11.11 | 39.9 | 22.73 | 62.63 | 46.97 |
| MN983693 | 26.51 | 21.48 | 27.18 | 24.83 | 52.01 | 36.87 | 29.29 | 16.67 | 17.17 | 33.84 | 15.66 | 24.24 | 25.25 | 34.85 | 60.1 | 26.26 | 11.11 | 39.9 | 22.73 | 62.63 | 46.97 |
| MN983692 | 27.09 | 22.66 | 27.09 | 23.17 | 50.26 | 36.92 | 29.74 | 16.41 | 16.92 | 33.33 | 15.9 | 27.18 | 25.64 | 31.28 | 56.92 | 27.69 | 11.28 | 39.49 | 21.54 | 61.03 | 45.13 |
| MN983691 | 27.26 | 22.49 | 26.75 | 23.51 | 50.26 | 36.92 | 29.74 | 16.41 | 16.92 | 33.33 | 16.41 | 26.67 | 24.62 | 32.31 | 56.92 | 27.69 | 11.28 | 39.49 | 21.54 | 61.03 | 45.13 |
| MN983690 | 26.01 | 22.65 | 28.36 | 22.99 | 51.34 | 37.37 | 29.29 | 17.17 | 16.16 | 33.33 | 14.65 | 27.78 | 28.28 | 29.29 | 57.58 | 25.76 | 11.11 | 39.39 | 23.74 | 63.13 | 45.45 |
| MN983689 | 26.17 | 22.48 | 27.68 | 23.66 | 51.34 | 36.87 | 29.29 | 16.67 | 17.17 | 33.84 | 14.65 | 26.77 | 26.77 | 31.82 | 58.59 | 26.26 | 11.62 | 39.9 | 22.22 | 62.12 | 46.21 |
| MN983688 | 26.17 | 22.48 | 27.68 | 23.66 | 51.34 | 36.87 | 29.29 | 16.67 | 17.17 | 33.84 | 14.65 | 26.77 | 26.77 | 31.82 | 58.59 | 26.26 | 11.62 | 39.9 | 22.22 | 62.12 | 46.21 |
| MN983687 | 26.17 | 22.48 | 27.68 | 23.66 | 51.34 | 36.87 | 29.29 | 16.67 | 17.17 | 33.84 | 14.65 | 26.77 | 26.77 | 31.82 | 58.59 | 26.26 | 11.62 | 39.9 | 22.22 | 62.12 | 46.21 |
| MN983686 | 26.01 | 22.15 | 28.36 | 23.49 | 51.85 | 36.36 | 28.28 | 18.18 | 17.17 | 35.35 | 15.66 | 26.77 | 27.27 | 30.3 | 57.58 | 25.76 | 11.62 | 39.39 | 23.23 | 62.63 | 46.46 |
| MN983685 | 26.51 | 22.48 | 27.52 | 23.49 | 51.01 | 36.36 | 29.29 | 16.67 | 17.68 | 34.34 | 16.16 | 27.27 | 25.76 | 30.81 | 56.57 | 26.26 | 11.11 | 40.4 | 22.22 | 62.63 | 45.45 |
| MN983684 | 26.51 | 22.32 | 27.52 | 23.66 | 51.17 | 36.36 | 29.29 | 16.67 | 17.68 | 34.34 | 16.16 | 26.77 | 25.76 | 31.31 | 57.07 | 26.26 | 11.11 | 40.4 | 22.22 | 62.63 | 45.71 |
| MN983683 | 26.85 | 22.65 | 27.68 | 22.82 | 50.5 | 37.37 | 28.79 | 16.67 | 17.17 | 33.84 | 16.67 | 28.28 | 26.77 | 28.28 | 55.05 | 25.76 | 11.11 | 39.9 | 23.23 | 63.13 | 44.44 |
| MN983682 | 26.85 | 22.65 | 27.68 | 22.82 | 50.5 | 37.37 | 28.79 | 16.67 | 17.17 | 33.84 | 16.67 | 28.28 | 26.77 | 28.28 | 55.05 | 25.76 | 11.11 | 39.9 | 23.23 | 63.13 | 44.44 |
| MN983681 | 26.68 | 22.99 | 27.52 | 22.82 | 50.34 | 37.37 | 28.79 | 16.67 | 17.17 | 33.84 | 16.16 | 28.79 | 26.26 | 28.79 | 55.05 | 25.76 | 11.62 | 39.9 | 22.73 | 62.63 | 44.44 |
| MN983680 | 26.68 | 22.99 | 27.52 | 22.82 | 50.34 | 37.37 | 28.79 | 16.67 | 17.17 | 33.84 | 16.16 | 28.79 | 26.26 | 28.79 | 55.05 | 25.76 | 11.62 | 39.9 | 22.73 | 62.63 | 44.44 |
| MN983679 | 26.68 | 22.99 | 27.52 | 22.82 | 50.34 | 37.37 | 28.79 | 16.67 | 17.17 | 33.84 | 16.16 | 28.79 | 26.26 | 28.79 | 55.05 | 25.76 | 11.62 | 39.9 | 22.73 | 62.63 | 44.44 |
| MN983678 | 25.84 | 21.14 | 28.19 | 24.83 | 53.02 | 36.87 | 29.29 | 16.67 | 17.17 | 33.84 | 13.64 | 23.74 | 28.28 | 34.34 | 62.63 | 26.26 | 10.61 | 39.9 | 23.23 | 63.13 | 48.23 |
| MT018040 | 26.01 | 22.65 | 28.52 | 22.82 | 51.34 | 37.37 | 29.29 | 17.17 | 16.16 | 33.33 | 14.65 | 27.78 | 28.79 | 28.79 | 57.58 | 25.76 | 11.11 | 39.39 | 23.74 | 63.13 | 45.45 |
| MT018039 | 26.01 | 22.15 | 28.36 | 23.49 | 51.85 | 36.36 | 28.28 | 18.18 | 17.17 | 35.35 | 15.66 | 26.77 | 27.27 | 30.3 | 57.58 | 25.76 | 11.62 | 39.39 | 23.23 | 62.63 | 46.46 |
| MT018038 | 26.17 | 22.32 | 28.36 | 23.15 | 51.51 | 37.37 | 29.29 | 16.67 | 16.67 | 33.33 | 13.64 | 27.27 | 28.79 | 30.3 | 59.09 | 27.27 | 10.61 | 39.39 | 22.73 | 62.12 | 46.21 |
| MT018037 | 26.17 | 22.32 | 28.36 | 23.15 | 51.51 | 37.37 | 29.29 | 16.67 | 16.67 | 33.33 | 13.64 | 27.27 | 28.79 | 30.3 | 59.09 | 27.27 | 10.61 | 39.39 | 22.73 | 62.12 | 46.21 |
| MT018036 | 26.17 | 22.32 | 28.36 | 23.15 | 51.51 | 37.37 | 29.29 | 16.67 | 16.67 | 33.33 | 13.64 | 27.27 | 28.79 | 30.3 | 59.09 | 27.27 | 10.61 | 39.39 | 22.73 | 62.12 | 46.21 |
| MT018035 | 26.17 | 22.65 | 27.85 | 23.32 | 51.17 | 36.87 | 29.29 | 16.67 | 17.17 | 33.84 | 14.65 | 27.27 | 27.27 | 30.81 | 58.08 | 26.26 | 11.62 | 39.9 | 22.22 | 62.12 | 45.96 |
| MT018034 | 26.51 | 21.48 | 27.18 | 24.83 | 52.01 | 36.87 | 29.29 | 16.67 | 17.17 | 33.84 | 15.66 | 24.24 | 25.25 | 34.85 | 60.1 | 26.26 | 11.11 | 39.9 | 22.73 | 62.63 | 46.97 |
| MT018033 | 26.51 | 21.48 | 27.18 | 24.83 | 52.01 | 36.87 | 29.29 | 16.67 | 17.17 | 33.84 | 15.66 | 24.24 | 25.25 | 34.85 | 60.1 | 26.26 | 11.11 | 39.9 | 22.73 | 62.63 | 46.97 |
| MT018030 | 26.01 | 21.98 | 27.52 | 24.5 | 52.01 | 36.87 | 29.29 | 16.67 | 17.17 | 33.84 | 14.65 | 25.76 | 25.76 | 33.84 | 59.6 | 25.76 | 11.11 | 40.4 | 22.73 | 63.13 | 46.72 |
| MT018028 | 26.68 | 22.32 | 27.18 | 23.83 | 51.01 | 36.87 | 29.29 | 16.67 | 17.17 | 33.84 | 16.67 | 25.76 | 25.25 | 32.32 | 57.58 | 25.76 | 12.12 | 39.9 | 22.22 | 62.12 | 45.71 |
| MT018027 | 26.17 | 22.48 | 27.68 | 23.66 | 51.34 | 36.87 | 29.29 | 16.67 | 17.17 | 33.84 | 14.65 | 26.77 | 26.77 | 31.82 | 58.59 | 26.26 | 11.62 | 39.9 | 22.22 | 62.12 | 46.21 |
| MT018026 | 25.84 | 21.14 | 28.19 | 24.83 | 53.02 | 36.87 | 29.29 | 16.67 | 17.17 | 33.84 | 13.64 | 23.74 | 28.28 | 34.34 | 62.63 | 26.26 | 10.61 | 39.9 | 23.23 | 63.13 | 48.23 |
| MT018025 | 25.84 | 22.82 | 27.68 | 23.66 | 51.34 | 36.87 | 29.29 | 16.67 | 17.17 | 33.84 | 14.14 | 28.79 | 26.26 | 30.81 | 57.07 | 25.76 | 10.61 | 40.4 | 23.23 | 63.64 | 45.45 |
| MT018024 | 26.85 | 22.65 | 27.68 | 22.82 | 50.5 | 37.37 | 28.79 | 16.67 | 17.17 | 33.84 | 16.67 | 28.28 | 26.77 | 28.28 | 55.05 | 25.76 | 11.11 | 39.9 | 23.23 | 63.13 | 44.44 |
| MT018023 | 26.68 | 22.99 | 27.52 | 22.82 | 50.34 | 37.37 | 28.79 | 16.67 | 17.17 | 33.84 | 16.16 | 28.79 | 26.26 | 28.79 | 55.05 | 25.76 | 11.62 | 39.9 | 22.73 | 62.63 | 44.44 |
| MT018022 | 26.68 | 22.99 | 27.52 | 22.82 | 50.34 | 37.37 | 28.79 | 16.67 | 17.17 | 33.84 | 16.16 | 28.79 | 26.26 | 28.79 | 55.05 | 25.76 | 11.62 | 39.9 | 22.73 | 62.63 | 44.44 |
| MT018020 | 27.01 | 23.15 | 27.68 | 22.15 | 49.83 | 37.37 | 28.79 | 16.67 | 17.17 | 33.84 | 17.17 | 29.29 | 26.77 | 26.77 | 53.54 | 25.76 | 11.62 | 39.9 | 22.73 | 62.63 | 43.69 |
| MT018019 | 26.68 | 21.98 | 27.35 | 23.99 | 51.34 | 36.36 | 29.29 | 16.67 | 17.68 | 34.34 | 16.67 | 25.76 | 25.25 | 32.32 | 57.58 | 26.26 | 11.11 | 40.4 | 22.22 | 62.63 | 45.96 |
| MT018018 | 27.18 | 22.32 | 26.68 | 23.83 | 50.5 | 36.36 | 29.29 | 16.67 | 17.68 | 34.34 | 18.69 | 26.77 | 23.23 | 31.31 | 54.55 | 25.76 | 11.11 | 40.4 | 22.73 | 63.13 | 44.44 |
| MT018017 | 27.26 | 22.49 | 26.75 | 23.51 | 50.26 | 36.92 | 29.74 | 16.41 | 16.92 | 33.33 | 16.41 | 26.67 | 24.62 | 32.31 | 56.92 | 27.69 | 11.28 | 39.49 | 21.54 | 61.03 | 45.13 |
| MT018016 | 27.09 | 22.66 | 26.92 | 23.34 | 50.26 | 36.92 | 29.74 | 16.41 | 16.92 | 33.33 | 15.9 | 27.18 | 25.13 | 31.79 | 56.92 | 27.69 | 11.28 | 39.49 | 21.54 | 61.03 | 45.13 |
| MT018015 | 25.67 | 22.15 | 27.35 | 24.83 | 52.18 | 35.86 | 30.3 | 16.67 | 17.17 | 33.84 | 14.65 | 24.24 | 25.76 | 35.35 | 61.11 | 25.76 | 12.12 | 39.9 | 22.22 | 62.12 | 47.47 |
| MT018014 | 25.5 | 22.48 | 27.52 | 24.5 | 52.01 | 35.86 | 30.3 | 16.67 | 17.17 | 33.84 | 13.64 | 25.25 | 26.26 | 34.85 | 61.11 | 26.26 | 12.12 | 39.9 | 21.72 | 61.62 | 47.47 |
| MT018012 | 25.5 | 22.32 | 27.68 | 24.5 | 52.18 | 35.86 | 30.3 | 16.67 | 17.17 | 33.84 | 13.64 | 24.75 | 26.77 | 34.85 | 61.62 | 26.26 | 12.12 | 39.9 | 21.72 | 61.62 | 47.73 |
| MT018011 | 25.5 | 22.32 | 27.68 | 24.5 | 52.18 | 35.86 | 30.3 | 16.67 | 17.17 | 33.84 | 13.64 | 24.75 | 26.77 | 34.85 | 61.62 | 26.26 | 12.12 | 39.9 | 21.72 | 61.62 | 47.73 |
| MT018010 | 25.5 | 22.32 | 27.68 | 24.5 | 52.18 | 35.86 | 30.3 | 16.67 | 17.17 | 33.84 | 13.64 | 24.75 | 26.77 | 34.85 | 61.62 | 26.26 | 12.12 | 39.9 | 21.72 | 61.62 | 47.73 |
| MN824478 | 26.17 | 22.32 | 28.36 | 23.15 | 51.51 | 37.37 | 29.29 | 16.67 | 16.67 | 33.33 | 13.64 | 27.27 | 28.79 | 30.3 | 59.09 | 27.27 | 10.61 | 39.39 | 22.73 | 62.12 | 46.21 |
| MN824477 | 26.17 | 22.48 | 28.36 | 22.99 | 51.34 | 37.37 | 29.29 | 16.67 | 16.67 | 33.33 | 13.64 | 27.78 | 28.79 | 29.8 | 58.59 | 27.27 | 10.61 | 39.39 | 22.73 | 62.12 | 45.96 |
| MN824476 | 26.17 | 22.48 | 28.36 | 22.99 | 51.34 | 37.37 | 29.29 | 16.67 | 16.67 | 33.33 | 13.64 | 27.78 | 28.79 | 29.8 | 58.59 | 27.27 | 10.61 | 39.39 | 22.73 | 62.12 | 45.96 |
| MN227071 | 25.84 | 22.32 | 28.02 | 23.83 | 51.85 | 36.87 | 29.29 | 16.67 | 17.17 | 33.84 | 13.64 | 26.26 | 27.78 | 32.32 | 60.1 | 26.26 | 11.62 | 39.9 | 22.22 | 62.12 | 46.97 |
| MN905511 | 26.74 | 22.55 | 25.73 | 24.98 | 50.71 | 28.72 | 13.6 | 33 | 24.69 | 57.68 | 36.52 | 26.2 | 17.38 | 19.9 | 37.28 | 15.11 | 27.96 | 26.45 | 30.48 | 56.93 | 47.48 |
| MH853660 | 26.17 | 22.48 | 27.68 | 23.66 | 51.34 | 36.87 | 29.29 | 16.67 | 17.17 | 33.84 | 14.65 | 26.77 | 26.77 | 31.82 | 58.59 | 26.26 | 11.62 | 39.9 | 22.22 | 62.12 | 46.21 |
| KT389687 | 27.09 | 22.66 | 26.92 | 23.34 | 50.26 | 36.92 | 29.74 | 16.41 | 16.92 | 33.33 | 15.9 | 27.18 | 25.13 | 31.79 | 56.92 | 27.69 | 11.28 | 39.49 | 21.54 | 61.03 | 45.13 |
| KT389685 | 26.68 | 22.15 | 27.18 | 23.99 | 51.17 | 36.87 | 29.29 | 16.67 | 17.17 | 33.84 | 16.67 | 25.25 | 25.25 | 32.83 | 58.08 | 25.76 | 12.12 | 39.9 | 22.22 | 62.12 | 45.96 |
| KT389684 | 25.84 | 22.65 | 28.52 | 22.99 | 51.51 | 37.37 | 29.29 | 17.17 | 16.16 | 33.33 | 14.14 | 27.78 | 28.79 | 29.29 | 58.08 | 25.76 | 11.11 | 39.39 | 23.74 | 63.13 | 45.71 |
| KT389682 | 25.67 | 22.15 | 27.85 | 24.33 | 52.18 | 35.86 | 30.3 | 16.67 | 17.17 | 33.84 | 14.14 | 24.24 | 27.27 | 34.34 | 61.62 | 26.26 | 12.12 | 39.9 | 21.72 | 61.62 | 47.73 |
| KT389681 | 26.17 | 22.48 | 27.68 | 23.66 | 51.34 | 36.87 | 29.29 | 16.67 | 17.17 | 33.84 | 14.65 | 26.77 | 26.77 | 31.82 | 58.59 | 26.26 | 11.62 | 39.9 | 22.22 | 62.12 | 46.21 |
| KT389680 | 26.17 | 22.48 | 27.68 | 23.66 | 51.34 | 36.87 | 29.29 | 16.67 | 17.17 | 33.84 | 14.65 | 26.77 | 26.77 | 31.82 | 58.59 | 26.26 | 11.62 | 39.9 | 22.22 | 62.12 | 46.21 |
| KT389679 | 26.01 | 21.64 | 27.35 | 25 | 52.35 | 36.87 | 29.29 | 16.67 | 17.17 | 33.84 | 14.65 | 25.25 | 25.25 | 34.85 | 60.1 | 25.76 | 10.61 | 40.4 | 23.23 | 63.64 | 46.97 |
| KT389678 | 26.01 | 22.32 | 28.36 | 23.32 | 51.68 | 36.36 | 28.28 | 18.18 | 17.17 | 35.35 | 15.66 | 27.27 | 27.27 | 29.8 | 57.07 | 25.76 | 11.62 | 39.39 | 23.23 | 62.63 | 46.21 |
| KT389676 | 26.85 | 22.65 | 27.68 | 22.82 | 50.5 | 37.37 | 28.79 | 16.67 | 17.17 | 33.84 | 16.67 | 28.28 | 26.77 | 28.28 | 55.05 | 25.76 | 11.11 | 39.9 | 23.23 | 63.13 | 44.44 |
| KT389674 | 25.67 | 22.99 | 27.52 | 23.83 | 51.34 | 35.86 | 30.3 | 16.67 | 17.17 | 33.84 | 14.65 | 26.77 | 25.76 | 32.83 | 58.59 | 25.76 | 12.12 | 40.4 | 21.72 | 62.12 | 46.21 |
| KT389673 | 26.17 | 22.65 | 27.85 | 23.32 | 51.17 | 36.87 | 29.29 | 16.67 | 17.17 | 33.84 | 14.65 | 27.27 | 27.27 | 30.81 | 58.08 | 26.26 | 11.62 | 39.9 | 22.22 | 62.12 | 45.96 |
| KT389672 | 27.18 | 22.65 | 27.01 | 23.15 | 50.17 | 36.36 | 29.29 | 16.67 | 17.68 | 34.34 | 18.69 | 27.78 | 24.24 | 29.29 | 53.54 | 25.76 | 11.11 | 40.4 | 22.73 | 63.13 | 43.94 |
| KY100877 | 26.17 | 22.48 | 27.68 | 23.66 | 51.34 | 36.87 | 29.29 | 16.67 | 17.17 | 33.84 | 14.65 | 26.77 | 26.77 | 31.82 | 58.59 | 26.26 | 11.62 | 39.9 | 22.22 | 62.12 | 46.21 |
| KC842131 | 26.57 | 22.53 | 26.12 | 24.78 | 50.9 | 37.04 | 24.92 | 17.51 | 20.54 | 38.05 | 16.84 | 30.98 | 25.25 | 26.94 | 52.19 | 25.93 | 11.78 | 35.35 | 26.94 | 62.29 | 45.12 |
| AF107801 | 25 | 22.7 | 25.78 | 26.52 | 52.3 | 28.09 | 12.98 | 33.3 | 25.64 | 58.94 | 32.87 | 27.23 | 18.4 | 21.49 | 39.89 | 14.04 | 27.87 | 25.64 | 32.45 | 58.09 | 49.41 |
| OR878479 | 25.74 | 22.34 | 25.64 | 26.28 | 51.91 | 35.46 | 25.56 | 17.57 | 21.41 | 38.98 | 14.38 | 28.75 | 25.56 | 31.31 | 56.87 | 27.16 | 12.78 | 33.87 | 26.2 | 60.06 | 47.92 |
| GU371767 | 24.73 | 23.03 | 25.8 | 26.44 | 52.24 | 32.05 | 26.28 | 19.87 | 21.79 | 41.67 | 15.38 | 27.56 | 25.64 | 31.41 | 57.05 | 26.92 | 15.38 | 32.05 | 25.64 | 57.69 | 49.36 |
| **Mean** | **26.5** | **22.56** | **27.3** | **23.64** | **50.94** | **34.46** | **27.56** | **18.99** | **18.99** | **37.98** | **18.23** | **26.27** | **26.73** | **28.78** | **55.5** | **26.3** | **14.03** | **36.36** | **23.32** | **59.68** | **46.74** |
| **std** | **0.7** | **0.55** | **0.87** | **1.12** | **0.72** | **6.34** | **4.6** | **5.13** | **4** | **8.77** | **6.14** | **4.32** | **3.72** | **3.6** | **5.74** | **4.32** | **6.02** | **7.03** | **2.49** | **7.16** | **3.73** |
| **Minimum** | **22.48** | **21.14** | **24.72** | **21.31** | **49.56** | **12.6** | **10.7** | **15.9** | **15.66** | **32.99** | **12.12** | **10.61** | **17.38** | **18.45** | **36.63** | **11.45** | **10.26** | **15.96** | **16.67** | **32.83** | **43.69** |
| **Maximum** | **28.14** | **26.96** | **28.86** | **26.84** | **53.02** | **37.88** | **36.34** | **37.04** | **32.33** | **61.73** | **36.52** | **31.43** | **39.9** | **35.35** | **63.83** | **41.49** | **30.07** | **40.4** | **33.12** | **63.64** | **60.61** |

**Supplementary Table S5. Codon usage indices (ENC, CBI, CAI, FOP) and protein properties (GRAVY and aromaticity) of the studied sequences**

| **Sequence** | **ENC** | **CBI** | **CAI** | **FOP** | **GRAVY** | **AROMO** |
| --- | --- | --- | --- | --- | --- | --- |
| MN534891 | 40.06 | 0.56 | 0.73 | 0.56 | -0.05 | 0.07 |
| MN422105 | 38.57 | 0.55 | 0.75 | 0.55 | -0.18 | 0.05 |
| KY742191 | 40.56 | 0.53 | 0.74 | 0.53 | -0.02 | 0.05 |
| MZ203135 | 40.30 | 0.48 | 0.66 | 0.48 | -0.10 | 0.07 |
| MT018029 | 38.11 | 0.58 | 0.76 | 0.58 | -0.13 | 0.07 |
| MT018021 | 40.51 | 0.57 | 0.75 | 0.57 | -0.21 | 0.06 |
| MH311851 | 38.58 | 0.33 | 0.58 | 0.33 | -1.05 | 0.05 |
| MH311850 | 38.96 | 0.33 | 0.57 | 0.33 | -1.03 | 0.08 |
| KY742193 | 39.95 | 0.53 | 0.75 | 0.53 | 0.00 | 0.06 |
| KY742192 | 40.56 | 0.53 | 0.74 | 0.53 | -0.02 | 0.05 |
| KY742189 | 38.73 | 0.53 | 0.75 | 0.53 | -0.04 | 0.05 |
| PX245470 | 36.40 | 0.36 | 0.58 | 0.36 | -0.84 | 0.07 |
| PX245469 | 37.96 | 0.51 | 0.70 | 0.51 | 0.08 | 0.06 |
| PX245468 | 36.87 | 0.49 | 0.69 | 0.49 | 0.04 | 0.06 |
| PX245467 | 36.99 | 0.34 | 0.59 | 0.34 | -0.97 | 0.07 |
| OR578559 | 40.64 | 0.58 | 0.77 | 0.58 | -0.14 | 0.06 |
| OQ343379 | 40.46 | 0.59 | 0.77 | 0.59 | -0.20 | 0.07 |
| MZ203136 | 35.66 | 0.41 | 0.59 | 0.41 | -0.47 | 0.07 |
| MT018032 | 37.75 | 0.54 | 0.74 | 0.54 | -0.17 | 0.05 |
| MT018031 | 37.75 | 0.54 | 0.74 | 0.54 | -0.17 | 0.05 |
| MT018013 | 39.86 | 0.56 | 0.74 | 0.56 | -0.23 | 0.07 |
| MN422104 | 38.57 | 0.55 | 0.75 | 0.55 | -0.18 | 0.05 |
| MN824479 | 39.77 | 0.54 | 0.75 | 0.54 | -0.01 | 0.05 |
| MN824475 | 39.47 | 0.54 | 0.76 | 0.54 | -0.08 | 0.05 |
| MK434860 | 35.98 | 0.40 | 0.61 | 0.40 | -0.57 | 0.08 |
| KY100876 | 40.34 | 0.54 | 0.74 | 0.54 | -0.22 | 0.06 |
| MK205423 | 37.02 | 0.33 | 0.58 | 0.33 | -0.94 | 0.05 |
| KT389686 | 39.76 | 0.53 | 0.73 | 0.53 | -0.17 | 0.07 |
| KT389683 | 39.77 | 0.58 | 0.76 | 0.58 | -0.03 | 0.07 |
| KT389677 | 40.04 | 0.57 | 0.75 | 0.57 | -0.19 | 0.07 |
| KT389675 | 41.08 | 0.55 | 0.75 | 0.55 | -0.22 | 0.06 |
| LC916163 | 38.15 | 0.57 | 0.76 | 0.57 | -0.17 | 0.06 |
| LC916162 | 38.15 | 0.57 | 0.76 | 0.57 | -0.17 | 0.06 |
| LC905563 | 36.77 | 0.57 | 0.76 | 0.57 | -0.14 | 0.06 |
| LC905562 | 36.77 | 0.57 | 0.76 | 0.57 | -0.14 | 0.06 |
| LC905401 | 38.15 | 0.57 | 0.76 | 0.57 | -0.17 | 0.06 |
| PX354083 | 40.30 | 0.48 | 0.66 | 0.48 | -0.10 | 0.07 |
| PX254435 | 37.53 | 0.58 | 0.76 | 0.58 | -0.19 | 0.05 |
| OR531376 | 36.71 | 0.39 | 0.60 | 0.39 | -0.48 | 0.07 |
| OR531375 | 39.92 | 0.34 | 0.59 | 0.34 | -0.82 | 0.08 |
| OR531374 | 39.87 | 0.34 | 0.58 | 0.34 | -0.86 | 0.08 |
| OR531373 | 39.87 | 0.35 | 0.58 | 0.35 | -0.86 | 0.08 |
| OR161338 | 40.06 | 0.56 | 0.73 | 0.56 | -0.05 | 0.07 |
| OP937342 | 37.57 | 0.53 | 0.71 | 0.53 | 0.00 | 0.07 |
| OP810571 | 40.26 | 0.35 | 0.60 | 0.35 | -1.00 | 0.08 |
| OP810570 | 36.94 | 0.50 | 0.68 | 0.50 | 0.00 | 0.05 |
| OM793716 | 34.13 | 0.41 | 0.60 | 0.41 | -0.53 | 0.07 |
| OP103719 | 39.73 | 0.53 | 0.76 | 0.53 | -0.09 | 0.05 |
| MZ146784 | 40.78 | 0.33 | 0.58 | 0.33 | -0.95 | 0.07 |
| MZ161160 | 37.53 | 0.58 | 0.76 | 0.58 | -0.19 | 0.05 |
| MW149264 | 36.72 | 0.50 | 0.69 | 0.50 | -0.08 | 0.06 |
| MT222287 | 34.86 | 0.40 | 0.62 | 0.40 | -0.40 | 0.08 |
| KY742190 | 38.73 | 0.53 | 0.75 | 0.53 | -0.04 | 0.05 |
| PX245466 | 38.69 | 0.34 | 0.59 | 0.34 | -0.84 | 0.06 |
| PX245465 | 38.19 | 0.33 | 0.60 | 0.33 | -0.83 | 0.07 |
| PX245464 | 37.83 | 0.33 | 0.59 | 0.33 | -0.86 | 0.07 |
| PX245463 | 40.21 | 0.51 | 0.71 | 0.51 | 0.01 | 0.07 |
| PX138673 | 40.30 | 0.48 | 0.67 | 0.48 | -0.19 | 0.06 |
| PX138672 | 37.62 | 0.35 | 0.60 | 0.35 | -1.03 | 0.07 |
| PX138671 | 40.30 | 0.48 | 0.67 | 0.48 | -0.19 | 0.06 |
| PX138670 | 40.30 | 0.48 | 0.67 | 0.48 | -0.19 | 0.06 |
| PX138669 | 40.30 | 0.48 | 0.67 | 0.48 | -0.19 | 0.06 |
| PX138668 | 40.30 | 0.48 | 0.67 | 0.48 | -0.19 | 0.06 |
| PV691788 | 38.98 | 0.49 | 0.68 | 0.49 | 0.01 | 0.06 |
| PV021910 | 37.55 | 0.42 | 0.64 | 0.42 | 0.12 | 0.10 |
| PP785985 | 36.67 | 0.38 | 0.57 | 0.38 | -0.54 | 0.07 |
| PP389363 | 40.06 | 0.56 | 0.73 | 0.56 | -0.05 | 0.07 |
| PP389362 | 40.06 | 0.56 | 0.73 | 0.56 | -0.05 | 0.07 |
| PP389361 | 40.06 | 0.56 | 0.73 | 0.56 | -0.05 | 0.07 |
| PP389360 | 40.06 | 0.56 | 0.73 | 0.56 | -0.05 | 0.07 |
| PP259445 | 38.92 | 0.56 | 0.76 | 0.56 | -0.27 | 0.05 |
| OR672525 | 34.09 | 0.41 | 0.60 | 0.41 | -0.45 | 0.07 |
| OR572168 | 39.02 | 0.59 | 0.76 | 0.59 | -0.26 | 0.06 |
| OR572167 | 39.02 | 0.59 | 0.76 | 0.59 | -0.26 | 0.06 |
| OR572166 | 37.12 | 0.59 | 0.76 | 0.59 | -0.18 | 0.06 |
| OR572165 | 39.02 | 0.59 | 0.76 | 0.59 | -0.26 | 0.06 |
| OR572164 | 39.02 | 0.59 | 0.76 | 0.59 | -0.26 | 0.06 |
| OR572163 | 39.02 | 0.59 | 0.76 | 0.59 | -0.26 | 0.06 |
| OR572162 | 39.02 | 0.59 | 0.76 | 0.59 | -0.26 | 0.06 |
| OR572161 | 39.02 | 0.59 | 0.76 | 0.59 | -0.26 | 0.06 |
| OR572160 | 39.02 | 0.59 | 0.76 | 0.59 | -0.26 | 0.06 |
| OR572159 | 39.02 | 0.59 | 0.76 | 0.59 | -0.26 | 0.06 |
| OR572158 | 39.02 | 0.59 | 0.76 | 0.59 | -0.26 | 0.06 |
| OR572157 | 39.02 | 0.59 | 0.76 | 0.59 | -0.26 | 0.06 |
| OR572156 | 39.02 | 0.59 | 0.76 | 0.59 | -0.26 | 0.06 |
| OR572155 | 39.02 | 0.59 | 0.76 | 0.59 | -0.26 | 0.06 |
| OR572154 | 39.02 | 0.59 | 0.76 | 0.59 | -0.26 | 0.06 |
| OR572153 | 39.02 | 0.59 | 0.76 | 0.59 | -0.26 | 0.06 |
| OR572152 | 39.02 | 0.59 | 0.76 | 0.59 | -0.26 | 0.06 |
| OR572151 | 39.02 | 0.59 | 0.76 | 0.59 | -0.26 | 0.06 |
| OR572150 | 39.02 | 0.59 | 0.76 | 0.59 | -0.26 | 0.06 |
| OR572149 | 39.02 | 0.59 | 0.76 | 0.59 | -0.26 | 0.06 |
| OR572148 | 39.02 | 0.59 | 0.76 | 0.59 | -0.26 | 0.06 |
| OR572147 | 39.02 | 0.59 | 0.76 | 0.59 | -0.26 | 0.06 |
| OR572146 | 39.02 | 0.59 | 0.76 | 0.59 | -0.26 | 0.06 |
| OR572145 | 39.02 | 0.59 | 0.76 | 0.59 | -0.26 | 0.06 |
| OR572144 | 39.02 | 0.59 | 0.76 | 0.59 | -0.26 | 0.06 |
| OR572143 | 39.02 | 0.59 | 0.76 | 0.59 | -0.26 | 0.06 |
| OR572142 | 39.02 | 0.59 | 0.76 | 0.59 | -0.26 | 0.06 |
| OR572141 | 39.02 | 0.59 | 0.76 | 0.59 | -0.26 | 0.06 |
| OR572140 | 39.02 | 0.59 | 0.76 | 0.59 | -0.26 | 0.06 |
| OR572139 | 39.02 | 0.59 | 0.76 | 0.59 | -0.26 | 0.06 |
| OR572138 | 39.02 | 0.59 | 0.76 | 0.59 | -0.26 | 0.06 |
| OR572137 | 39.02 | 0.59 | 0.76 | 0.59 | -0.26 | 0.06 |
| OR572136 | 39.02 | 0.59 | 0.76 | 0.59 | -0.26 | 0.06 |
| OR572135 | 39.02 | 0.59 | 0.76 | 0.59 | -0.26 | 0.06 |
| OR572134 | 39.02 | 0.59 | 0.76 | 0.59 | -0.26 | 0.06 |
| OR572133 | 39.02 | 0.59 | 0.76 | 0.59 | -0.26 | 0.06 |
| OR572132 | 39.02 | 0.59 | 0.76 | 0.59 | -0.26 | 0.06 |
| OR572131 | 39.02 | 0.59 | 0.76 | 0.59 | -0.26 | 0.06 |
| OR572130 | 39.02 | 0.59 | 0.76 | 0.59 | -0.26 | 0.06 |
| OR572129 | 39.02 | 0.59 | 0.76 | 0.59 | -0.26 | 0.06 |
| OR572128 | 39.02 | 0.59 | 0.76 | 0.59 | -0.26 | 0.06 |
| OR572127 | 39.02 | 0.59 | 0.76 | 0.59 | -0.26 | 0.06 |
| OR572126 | 39.02 | 0.59 | 0.76 | 0.59 | -0.26 | 0.06 |
| OR572125 | 39.02 | 0.59 | 0.76 | 0.59 | -0.26 | 0.06 |
| OR572124 | 39.02 | 0.59 | 0.76 | 0.59 | -0.26 | 0.06 |
| OR572123 | 39.02 | 0.59 | 0.76 | 0.59 | -0.26 | 0.06 |
| OR572122 | 39.02 | 0.59 | 0.76 | 0.59 | -0.26 | 0.06 |
| OR572121 | 39.02 | 0.59 | 0.76 | 0.59 | -0.26 | 0.06 |
| OR572120 | 39.02 | 0.59 | 0.76 | 0.59 | -0.26 | 0.06 |
| OR572119 | 39.02 | 0.59 | 0.76 | 0.59 | -0.26 | 0.06 |
| OR572118 | 39.02 | 0.59 | 0.76 | 0.59 | -0.26 | 0.06 |
| OR572117 | 39.02 | 0.59 | 0.76 | 0.59 | -0.26 | 0.06 |
| OR572116 | 39.02 | 0.59 | 0.76 | 0.59 | -0.26 | 0.06 |
| OR572115 | 39.02 | 0.59 | 0.76 | 0.59 | -0.26 | 0.06 |
| OR572114 | 39.02 | 0.59 | 0.76 | 0.59 | -0.26 | 0.06 |
| OR572113 | 39.02 | 0.59 | 0.76 | 0.59 | -0.26 | 0.06 |
| OR572112 | 39.02 | 0.59 | 0.76 | 0.59 | -0.26 | 0.06 |
| OR572111 | 39.02 | 0.59 | 0.76 | 0.59 | -0.26 | 0.06 |
| OR572110 | 39.02 | 0.59 | 0.76 | 0.59 | -0.26 | 0.06 |
| OR572109 | 39.02 | 0.59 | 0.76 | 0.59 | -0.26 | 0.06 |
| OR572108 | 39.02 | 0.59 | 0.76 | 0.59 | -0.26 | 0.06 |
| OR572107 | 39.02 | 0.59 | 0.76 | 0.59 | -0.26 | 0.06 |
| OR572106 | 39.02 | 0.59 | 0.76 | 0.59 | -0.26 | 0.06 |
| OR572105 | 39.02 | 0.59 | 0.76 | 0.59 | -0.26 | 0.06 |
| OR572104 | 39.02 | 0.59 | 0.76 | 0.59 | -0.26 | 0.06 |
| OR545224 | 36.60 | 0.38 | 0.57 | 0.38 | -0.55 | 0.07 |
| OR545223 | 36.99 | 0.33 | 0.59 | 0.33 | -1.01 | 0.08 |
| OQ326504 | 36.39 | 0.32 | 0.60 | 0.32 | -0.94 | 0.08 |
| OQ271774 | 40.41 | 0.49 | 0.68 | 0.49 | -0.20 | 0.07 |
| OQ343380 | 38.38 | 0.58 | 0.77 | 0.58 | -0.24 | 0.07 |
| OQ190092 | 35.54 | 0.41 | 0.59 | 0.41 | -0.45 | 0.08 |
| OQ221891 | 37.61 | 0.41 | 0.63 | 0.41 | 0.16 | 0.10 |
| OM982463 | 36.32 | 0.39 | 0.57 | 0.39 | -0.57 | 0.07 |
| OM982462 | 36.40 | 0.39 | 0.57 | 0.39 | -0.56 | 0.07 |
| OM982461 | 36.37 | 0.39 | 0.58 | 0.39 | -0.57 | 0.07 |
| OM982460 | 36.37 | 0.39 | 0.58 | 0.39 | -0.57 | 0.07 |
| OM982459 | 36.37 | 0.39 | 0.58 | 0.39 | -0.56 | 0.07 |
| OM982458 | 36.40 | 0.39 | 0.57 | 0.39 | -0.56 | 0.07 |
| OM982457 | 36.40 | 0.39 | 0.57 | 0.39 | -0.56 | 0.07 |
| MZ673654 | 38.62 | 0.32 | 0.58 | 0.32 | -0.90 | 0.08 |
| MZ673653 | 38.36 | 0.32 | 0.59 | 0.32 | -0.89 | 0.08 |
| MZ673652 | 38.81 | 0.32 | 0.59 | 0.32 | -0.87 | 0.07 |
| MW531666 | 37.89 | 0.58 | 0.75 | 0.58 | -0.24 | 0.06 |
| MW531665 | 39.02 | 0.59 | 0.76 | 0.59 | -0.26 | 0.06 |
| MW531664 | 37.89 | 0.58 | 0.75 | 0.58 | -0.24 | 0.06 |
| MW531663 | 39.08 | 0.58 | 0.75 | 0.58 | -0.22 | 0.06 |
| MW531662 | 39.08 | 0.58 | 0.75 | 0.58 | -0.22 | 0.06 |
| MW531661 | 39.02 | 0.59 | 0.76 | 0.59 | -0.26 | 0.06 |
| MW321597 | 39.02 | 0.59 | 0.76 | 0.59 | -0.26 | 0.06 |
| MW853801 | 40.44 | 0.53 | 0.72 | 0.53 | 0.01 | 0.07 |
| MW853800 | 40.06 | 0.56 | 0.73 | 0.56 | -0.05 | 0.07 |
| MW853799 | 40.06 | 0.56 | 0.73 | 0.56 | -0.05 | 0.07 |
| MW853798 | 40.06 | 0.56 | 0.73 | 0.56 | -0.05 | 0.07 |
| MW853797 | 39.88 | 0.55 | 0.73 | 0.55 | -0.02 | 0.07 |
| LR983949 | 35.65 | 0.40 | 0.60 | 0.40 | -0.51 | 0.06 |
| MN983695 | 39.96 | 0.56 | 0.74 | 0.56 | -0.36 | 0.06 |
| MN983694 | 39.96 | 0.56 | 0.74 | 0.56 | -0.36 | 0.06 |
| MN983693 | 39.96 | 0.56 | 0.74 | 0.56 | -0.36 | 0.06 |
| MN983692 | 38.68 | 0.54 | 0.75 | 0.54 | -0.09 | 0.06 |
| MN983691 | 39.63 | 0.55 | 0.75 | 0.55 | -0.11 | 0.06 |
| MN983690 | 39.48 | 0.55 | 0.76 | 0.55 | -0.07 | 0.06 |
| MN983689 | 40.30 | 0.58 | 0.75 | 0.58 | -0.19 | 0.07 |
| MN983688 | 40.30 | 0.58 | 0.75 | 0.58 | -0.19 | 0.07 |
| MN983687 | 40.30 | 0.58 | 0.75 | 0.58 | -0.19 | 0.07 |
| MN983686 | 40.25 | 0.51 | 0.74 | 0.51 | -0.05 | 0.06 |
| MN983685 | 40.56 | 0.56 | 0.74 | 0.56 | -0.19 | 0.07 |
| MN983684 | 40.04 | 0.57 | 0.75 | 0.57 | -0.19 | 0.07 |
| MN983683 | 39.02 | 0.59 | 0.76 | 0.59 | -0.26 | 0.06 |
| MN983682 | 39.02 | 0.59 | 0.76 | 0.59 | -0.26 | 0.06 |
| MN983681 | 37.53 | 0.58 | 0.76 | 0.58 | -0.19 | 0.05 |
| MN983680 | 37.53 | 0.58 | 0.76 | 0.58 | -0.19 | 0.05 |
| MN983679 | 37.53 | 0.58 | 0.76 | 0.58 | -0.19 | 0.05 |
| MN983678 | 40.36 | 0.55 | 0.76 | 0.55 | -0.32 | 0.06 |
| MT018040 | 39.65 | 0.55 | 0.76 | 0.55 | -0.07 | 0.06 |
| MT018039 | 40.25 | 0.51 | 0.74 | 0.51 | -0.05 | 0.06 |
| MT018038 | 39.60 | 0.54 | 0.76 | 0.54 | -0.10 | 0.05 |
| MT018037 | 39.60 | 0.54 | 0.76 | 0.54 | -0.10 | 0.05 |
| MT018036 | 39.60 | 0.54 | 0.76 | 0.54 | -0.10 | 0.05 |
| MT018035 | 38.15 | 0.57 | 0.76 | 0.57 | -0.17 | 0.06 |
| MT018034 | 39.96 | 0.56 | 0.74 | 0.56 | -0.36 | 0.06 |
| MT018033 | 39.96 | 0.56 | 0.74 | 0.56 | -0.36 | 0.06 |
| MT018030 | 38.38 | 0.58 | 0.77 | 0.58 | -0.24 | 0.07 |
| MT018028 | 39.49 | 0.56 | 0.76 | 0.56 | -0.19 | 0.07 |
| MT018027 | 40.30 | 0.58 | 0.75 | 0.58 | -0.19 | 0.07 |
| MT018026 | 40.36 | 0.55 | 0.76 | 0.55 | -0.32 | 0.06 |
| MT018025 | 39.77 | 0.58 | 0.76 | 0.58 | -0.03 | 0.07 |
| MT018024 | 39.02 | 0.59 | 0.76 | 0.59 | -0.26 | 0.06 |
| MT018023 | 37.53 | 0.58 | 0.76 | 0.58 | -0.19 | 0.05 |
| MT018022 | 37.53 | 0.58 | 0.76 | 0.58 | -0.19 | 0.05 |
| MT018020 | 37.12 | 0.59 | 0.76 | 0.59 | -0.18 | 0.06 |
| MT018019 | 39.37 | 0.59 | 0.77 | 0.59 | -0.25 | 0.07 |
| MT018018 | 39.89 | 0.55 | 0.75 | 0.55 | -0.24 | 0.08 |
| MT018017 | 39.63 | 0.55 | 0.75 | 0.55 | -0.11 | 0.06 |
| MT018016 | 38.93 | 0.54 | 0.75 | 0.54 | -0.08 | 0.06 |
| MT018015 | 38.97 | 0.53 | 0.73 | 0.53 | -0.25 | 0.07 |
| MT018014 | 39.86 | 0.56 | 0.74 | 0.56 | -0.23 | 0.07 |
| MT018012 | 38.46 | 0.56 | 0.75 | 0.56 | -0.25 | 0.07 |
| MT018011 | 38.46 | 0.56 | 0.75 | 0.56 | -0.25 | 0.07 |
| MT018010 | 38.46 | 0.56 | 0.75 | 0.56 | -0.25 | 0.07 |
| MN824478 | 39.60 | 0.54 | 0.76 | 0.54 | -0.10 | 0.05 |
| MN824477 | 39.36 | 0.54 | 0.76 | 0.54 | -0.07 | 0.05 |
| MN824476 | 39.47 | 0.54 | 0.76 | 0.54 | -0.08 | 0.05 |
| MN227071 | 38.57 | 0.55 | 0.75 | 0.55 | -0.18 | 0.05 |
| MN905511 | 35.19 | 0.41 | 0.59 | 0.41 | -0.53 | 0.07 |
| MH853660 | 40.30 | 0.58 | 0.75 | 0.58 | -0.19 | 0.07 |
| KT389687 | 38.93 | 0.54 | 0.75 | 0.54 | -0.08 | 0.06 |
| KT389685 | 39.40 | 0.55 | 0.76 | 0.55 | -0.20 | 0.07 |
| KT389684 | 40.86 | 0.55 | 0.76 | 0.55 | -0.07 | 0.06 |
| KT389682 | 38.19 | 0.56 | 0.74 | 0.56 | -0.27 | 0.06 |
| KT389681 | 40.30 | 0.58 | 0.75 | 0.58 | -0.19 | 0.07 |
| KT389680 | 40.30 | 0.58 | 0.75 | 0.58 | -0.19 | 0.07 |
| KT389679 | 40.34 | 0.54 | 0.74 | 0.54 | -0.22 | 0.06 |
| KT389678 | 40.32 | 0.51 | 0.73 | 0.51 | -0.03 | 0.06 |
| KT389676 | 39.02 | 0.59 | 0.76 | 0.59 | -0.26 | 0.06 |
| KT389674 | 38.65 | 0.56 | 0.75 | 0.56 | -0.18 | 0.07 |
| KT389673 | 38.15 | 0.57 | 0.76 | 0.57 | -0.17 | 0.06 |
| KT389672 | 38.38 | 0.58 | 0.76 | 0.58 | -0.22 | 0.07 |
| KY100877 | 40.30 | 0.58 | 0.75 | 0.58 | -0.19 | 0.07 |
| KC842131 | 34.69 | 0.54 | 0.71 | 0.54 | -0.04 | 0.06 |
| AF107801 | 34.10 | 0.39 | 0.60 | 0.39 | -0.46 | 0.08 |
| OR878479 | 38.98 | 0.49 | 0.68 | 0.49 | 0.01 | 0.06 |
| GU371767 | 44.81 | 0.47 | 0.68 | 0.47 | -0.07 | 0.06 |
| **Mean** | **38.84** | **0.53** | **0.72** | **0.53** | **-0.27** | **0.06** |
| **std** | **1.40** | **0.08** | **0.06** | **0.08** | **0.23** | **0.01** |
| **Minimum** | **34.09** | **0.32** | **0.57** | **0.32** | **-1.05** | **0.05** |
| **Maximum** | **44.81** | **0.59** | **0.77** | **0.59** | **0.16** | **0.10** |
